# Supplementary material for: Cp2ZrCl2 – Et3Al reagent system in the homo-coupling of trimethylsilyl-substituted alkynes
Source: Royal Society of Chemistry journal article supplement (doi:10.1039/d1ra08268j), 2021-01-01
Supplement: d1ra08268j1.pdf [file d1ra08268j1.pdf]

## Electronic supplementary materials

### Cp<sub>2</sub>ZrCl<sub>2</sub> – Et<sub>3</sub>Al Reagent in the Homo-Coupling of Silyl-Substituted Alkynes

Ilfir R. Ramazanov,\* Rita N. Kadikova, Aliya K. Amirova, Oleg S. Mozgovej and Usein M. Dzhemilev

#### General information

The reagents were obtained from Sigma-Aldrich or Acros. Toluene was distilled over Na. Silyl-substituted alkynes were prepared by the reaction of terminal acetylenes with EtMgBr and trialkylchlorosilanes [1]. IR spectra were recorded on Bruker VE Vertex 70v spectrometer as liquid films or in Nujol and are reported in wavenumbers (cm<sup>-1</sup>). Nuclear magnetic resonance spectroscopy was performed on a Bruker Avance 500. The <sup>1</sup>H NMR spectra were recorded at 500 MHz and <sup>13</sup>C-<sup>1</sup>H NMR spectra at 125 MHz in CDCl<sub>3</sub>. The chemical shifts are reported in ppm relative to tetramethylsilane (TMS) as the internal standard. The numbering of atoms in the <sup>13</sup>C and <sup>1</sup>H NMR spectra of the compounds **2a-e**, **3b**, **4a**, **4b**, **4d**, **6**, **7** is shown in Figure 1. Mass spectra were obtained on a Finnigan 4021 instrument. All quantum-chemical calculations were performed using B3LYP/6-31G(d)/LanL2DZ basis set as implemented in Gaussian 09 software [2].

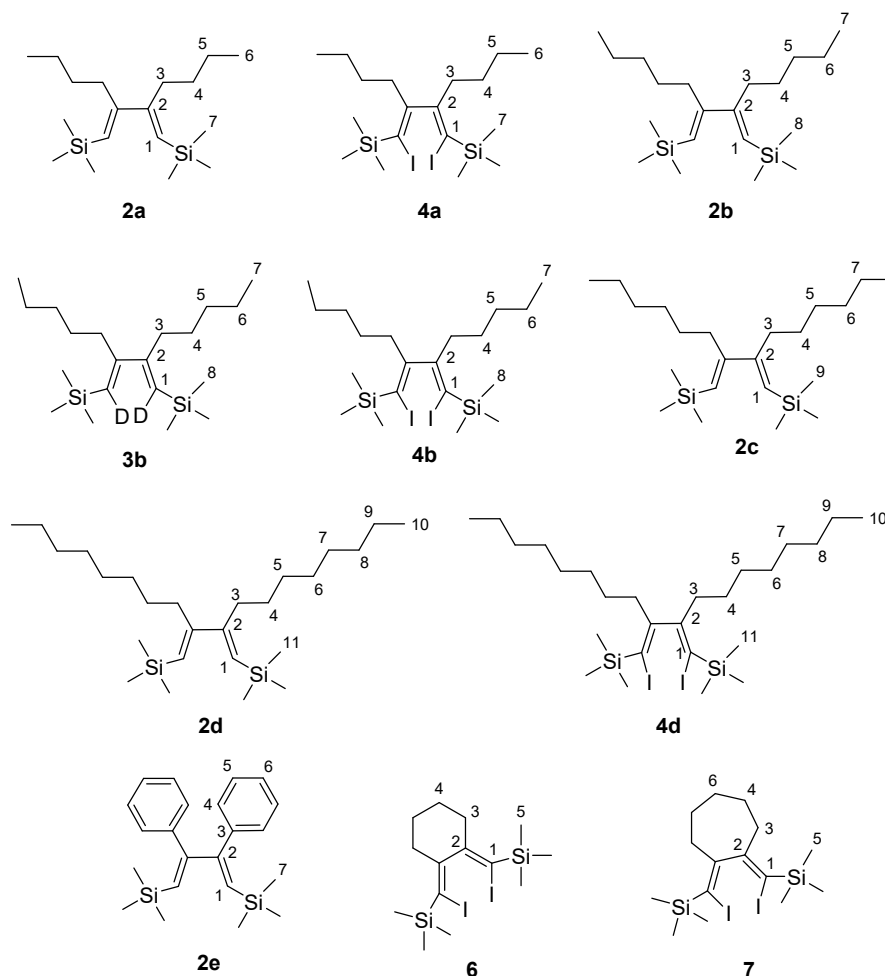

**Figure 1.** The numbering of atoms in the reported <sup>13</sup>C- and <sup>1</sup>H-NMR spectral data of the compounds **2a-e**, **3b**, **4a**, **4b**, **4d**, **6**, **7**.

#### 4.2. Homo-Coupling of Trimethylsilyl-Substituted Alkynes by $Cp_2ZrCl_2 - Et_3Al$ Reagent.

A suspension of  $Cp_2ZrCl_2$  (292 mg, 1.00 mmol) in toluene (3 mL) in a 25 mL round bottom flask was cooled with an ice-bath and then  $Et_3Al$  (0.3 mL, 2.00 mmol) was added. After stirring the mixture at 0 °C for 30 minutes, 1 mmol of trimethylsilyl-substituted alkyne or 0.5 mmol of trimethylsilyl-substituted  $\alpha,\omega$ -diyne was added. The mixture was stirred at 23 °C for 18 h. Then the mixture was diluted with hexane (5 mL) and  $H_2O$  (3 mL) (to prepare **2a-e**) or  $D_2O$  (3 mL) (to prepare **3b**) was added dropwise while cooling the reactor flask with an ice-bath. The precipitate was filtered on a filter paper. To prepare the compounds **4a**, **4b**, **4d**, a solution of  $I_2$  (787.5 mg, 6.25 mmol) in THF (5 mL) was added to the reaction mixture while cooling the reactor flask with an ice-bath and stirred at 23 °C for 1 h. To prepare the compounds **6**, **7**, a solution of  $I_2$  (787.5 mg, 6.25 mmol) in THF (5 mL) was used. The aqueous layer was extracted with diethyl ether (3×5 mL). The combined organic layers were washed with brine (10 mL), dried over anhydrous  $CaCl_2$ . Evaporation of solvent and purification of the residue by column chromatography (hexane) gave a colourless oil.

4.2.1. *((1E,3E)-2,3-dibutylbuta-1,3-diene-1,4-diyl)bis(trimethylsilane)* (**2a**) [3]. Yield: 133 mg (86%);  $R_f$  = 0.8 (hexane). IR (liquid film): 2956, 2873, 2861, 1593, 1561, 1465, 1248, 839, 769, 689, 619  $cm^{-1}$ .  $^1H$  NMR (500 MHz,  $CDCl_3$ ):  $\delta$  = 0.14 (s, 9H, C(7)H<sub>3</sub>), 0.92 (t,  $J$  = 7.0 Hz, 3H, C(6)H<sub>3</sub>), 1.28–1.36 (m, 4H, C(4, 5)H<sub>2</sub>), 2.29 (t,  $J$  = 6.4 Hz, 2H, C(3)H<sub>2</sub>), 5.48 (s, 1H, C(1)H).  $^{13}C$ - $\{^1H\}$  NMR (500 MHz,  $CDCl_3$ ):  $\delta$  = 0.36 (C(7)), 14.06 (C(6)), 22.93 (C(5)), 31.69 (C(4)), 33.74 (C(3)), 125.07 (C(1)), 160.67 (C(2)).  $^{29}Si$ - $\{^1H\}$  (500 MHz,  $CDCl_3$ ): -10.79. MS (EI):  $m/z$ , % = 311 (3) [ $M^+$ ], 295 (5), 268 (9), 237 (15), 207 (10), 165 (7), 138 (6), 73 (100), 45 (9).

4.2.2. *((1Z,3Z)-2,3-dibutyl-1,4-diiodobuta-1,3-diene-1,4-diyl)bis(trimethylsilane)* (**4a**) [4]. Yield: 247 mg (88%);  $R_f$  = 0.6 (hexane).  $^1H$  NMR (500 MHz,  $CDCl_3$ ):  $\delta$  = 0.36 (s, 9H, C(7)H<sub>3</sub>), 0.94 (t,  $J$  = 7.3 Hz, 1H, C(6)H<sub>3</sub>), 1.34 (q,  $J$  = 7.3 Hz,  $J$  = 14.5 Hz, 2H, C(5)H<sub>2</sub>), 1.46–1.55 (m, 1H(A), 1H(B), C(4)H<sub>2</sub>), 2.21 (t,  $J$  = 13.7 Hz, 1H(A), C(3)H<sub>2</sub>), 2.52 (t,  $J$  = 13.7 Hz, 1H(B), C(3)H<sub>2</sub>).  $^{13}C$ - $\{^1H\}$  NMR (500 MHz,  $CDCl_3$ ):  $\delta$  = 1.89 (C(7)), 13.83 (C(6)), 23.26 (C(5)), 30.84 (C(4)), 36.25 (C(3)), 108.67 (C(1)), 163.54 (C(2)). MS (EI):  $m/z$ , % = 562 (<1) [ $M^+$ ], 435 (84), 185 (14), 161 (26), 139 (7), 73 (100), 45 (13).

4.2.3. *((1E,3E)-2,3-dipentylbuta-1,3-diene-1,4-diyl)bis(trimethylsilane)* (**2b**). Yield: 141 mg (83%);  $R_f$  = 0.8 (hexane). IR (liquid film): 2956, 2926, 2856, 1593, 1560, 1466, 1248, 839, 772, 689, 620  $cm^{-1}$ .  $^1H$  NMR (500 MHz,  $CDCl_3$ ):  $\delta$  = 0.14 (s, 9H, C(8)H<sub>3</sub>), 0.91 (t,  $J$  = 7.0 Hz, 3H, C(7)H<sub>3</sub>), 1.28–1.35 (m, 6H, C(4, 5, 6)H<sub>2</sub>), 2.29 (t,  $J$  = 6.0 Hz, 2H, C(3)H<sub>2</sub>), 5.48 (s, 1H, C(1)H).  $^{13}C$ - $\{^1H\}$  NMR (500 MHz,  $CDCl_3$ ):  $\delta$  = 0.35 (C(8)), 14.03 (C(7)), 22.54 (C(6)), 29.13 (C(4)), 32.03 (C(5)), 33.95 (C(3)), 125.10 (C(1)), 160.69 (C(2)).  $^{29}Si$ - $\{^1H\}$  (500 MHz,  $CDCl_3$ ): -10.82. MS (EI):  $m/z$ , % = 339 (4) [ $M^+$ ], 338 (11), 282 (15), 265 (30), 209 (8), 191 (10), 73 (100), 45 (8).  $C_{20}H_{40}D_2Si_2$  Calc. C 70.92, H 12.50; CHN analysis, C 70.4, H 12.8.

4.2.4. *((1E,3E)-2,3-dipentylbuta-1,3-diene-1,4-diyl-1,4-d2)bis(trimethylsilane)* (**3b**). Yield: 145 mg (85%);  $R_f$  = 0.8 (hexane). IR (liquid film): 2956, 2928, 2859, 1589, 1556, 1466, 1379, 1248, 1097, 1042, 837, 761, 689, 616  $cm^{-1}$ .  $^1H$  NMR (500 MHz,  $CDCl_3$ ):  $\delta$  = 0.14 (s, 9H, C(8)H<sub>3</sub>), 0.91 (t,  $J$  = 6.7 Hz, 3H, C(7)H<sub>3</sub>), 1.28–1.33 (m, 6H, C(4, 5, 6)H<sub>2</sub>), 2.28 (t,  $J$  = 7.4 Hz, 2H, C(3)H<sub>2</sub>), 5.48 (s, 1H, C(1)H).  $^{13}C$ - $\{^1H\}$  NMR (500 MHz,  $CDCl_3$ ):  $\delta$  = 0.35 (C(8)), 14.04 (C(7)), 22.54 (C(6)), 29.14 (C(4)), 32.03 (C(5)), 32.95 (C(3)), 125.09 (C(1)), 160.60 (C(2)).  $^{29}Si$ - $\{^1H\}$  (500 MHz,  $CDCl_3$ ): -10.84. MS (EI):  $m/z$ , % = 341 (<1) [ $M^+$ ], 339 (4), 283 (5), 266 (10), 210 (4), 192 (5), 73 (100), 45 (6).  $C_{20}H_{42}Si_2$  Calc. C 70.50; CHN analysis, C 70.1.

4.2.5. *((1Z,3Z)-1,4-diiodo-2,3-dipentylbuta-1,3-diene-1,4-diyl)bis(trimethylsilane)* (**4b**). Yield: 204 mg (69%);  $R_f$  = 0.7 (hexane). IR (liquid film): 2956, 2930, 2873, 1970, 1462, 1249, 1116, 841, 759, 693, 588  $cm^{-1}$ .  $^1H$  NMR (500 MHz,  $CDCl_3$ ):  $\delta$  = 0.36 (s, 9H, C(8)H<sub>3</sub>), 0.92 (t,  $J$  = 7.1 Hz, 3H, C(7)H<sub>3</sub>), 1.28–1.31 (m, 2H, C(5)H<sub>2</sub>), 1.33–1.37 (m, 2H, C(6)H<sub>2</sub>), 1.50–1.56 (m, 1H(A), C(4)H<sub>2</sub>), 1.62–1.67 (m, 1H(B),

C(4)H<sub>2</sub>), 2.22 (t, *J* = 13.2 Hz, 1H(A), C(3)H<sub>2</sub>), 2.50 (t, *J* = 13.3 Hz, 1H(B), C(3)H<sub>2</sub>). <sup>13</sup>C-<sup>1</sup>H} NMR (500 MHz, CDCl<sub>3</sub>): δ = 1.88 (C(8)), 14.04 (C(7)), 22.38 (C(6)), 28.50 (C(4)), 32.35 (C(5)), 36.49 (C(3)), 108.58 (C(1)), 163.68 (C(2)). <sup>29</sup>Si-<sup>1</sup>H} (500 MHz, CDCl<sub>3</sub>): 0.93. MS (EI): *m/z*, % = 591 (<1) [M<sup>+</sup>], 463 (13), 189 (10), 95 (3), 73 (100), 45 (4). C<sub>20</sub>H<sub>40</sub>I<sub>2</sub>Si<sub>2</sub> Calc. C 40.68, H 6.83; CHN analysis, C 40.5, H 6.6.

4.2.6. ((1*E*,3*E*)-2,3-dihexylbuta-1,3-diene-1,4-diyl)bis(trimethylsilane) (**2c**) [5]. Yield: 143 mg (78%); R<sub>f</sub> = 0.7 (hexane). IR (liquid film): 2956, 2927, 2857, 1592, 1561, 1466, 839, 771, 749, 689, 619 cm<sup>-1</sup>. <sup>1</sup>H NMR (500 MHz, CDCl<sub>3</sub>): δ = 0.14 (s, 9H, C(9)H<sub>3</sub>), 0.91 (t, *J* = 6.9 Hz, 3H, C(8)H<sub>3</sub>), 1.28–1.33 (m, 8H, C(4, 5, 6, 7)H<sub>2</sub>), 2.29 (t, *J* = 7.3 Hz, 2H, C(3)H<sub>2</sub>), 5.48 (s, 1H, C(1)H). <sup>13</sup>C-<sup>1</sup>H} NMR (500 MHz, CDCl<sub>3</sub>): δ = 0.35 (C(9)), 14.06 (C(8)), 22.59 (C(7)), 29.40 (C(4)), 29.47 (C(5)), 31.73 (C(6)), 34.00 (C(3)), 125.10 (C(1)), 160.71 (C(2)). <sup>29</sup>Si-<sup>1</sup>H} (500 MHz, CDCl<sub>3</sub>): -10.84. MS (EI): *m/z*, % = 367 (2) [M<sup>+</sup>], 293 (14), 263 (5), 219 (6), 138 (4), 73 (100), 45 (6).

4.2.7. ((1*E*,3*E*)-2,3-dioctylbuta-1,3-diene-1,4-diyl)bis(trimethylsilane) (**2d**). Yield: 186 mg (84%); R<sub>f</sub> = 0.7 (hexane). IR (liquid film): 2955, 2926, 2855, 1736, 1465, 1378, 1248, 840, 722, 690, 620 cm<sup>-1</sup>. <sup>1</sup>H NMR (500 MHz, CDCl<sub>3</sub>): δ = 0.14 (s, 9H, C(11)H<sub>3</sub>), 0.91 (t, *J* = 7.2 Hz, 3H, C(10)H<sub>3</sub>), 1.29 (s, 12H, C(4-9)H<sub>2</sub>), 2.29 (t, *J* = 7.8 Hz, 2H, C(3)H<sub>2</sub>), 5.48 (s, 1H, C(1)H). <sup>13</sup>C-<sup>1</sup>H} NMR (500 MHz, CDCl<sub>3</sub>): δ = 0.36 (C(11)), 14.12 (C(10)), 22.69 (C(9)), 29.26 (C(4)), 29.44 (C(5)), 29.49 (C(7)), 29.80 (C(6)), 31.89 (C(8)), 33.99 (C(3)), 125.08 (C(1)), 160.71 (C(2)). <sup>29</sup>Si-<sup>1</sup>H} (500 MHz, CDCl<sub>3</sub>): -10.82. MS (EI): *m/z*, % = 423 (6) [M<sup>+</sup>], 422 (<1), 349 (15), 324 (9), 275 (6), 251 (7), 226 (5), 73 (100), 45 (3). C<sub>26</sub>H<sub>54</sub>Si<sub>2</sub> Calc. C 73.85, H 12.87; CHN analysis, C 74.3, H 12.5.

4.2.8. ((1*Z*,3*Z*)-1,4-diiodo-2,3-dioctylbuta-1,3-diene-1,4-diyl)bis(trimethylsilane) (**4d**). Yield: 233 mg (69%); R<sub>f</sub> = 0.7 (hexane). <sup>1</sup>H NMR (500 MHz, CDCl<sub>3</sub>): δ = 0.36 (s, 9H, C(11)H<sub>3</sub>), 0.91 (t, *J* = 6.9 Hz, 3H, C(10)H<sub>3</sub>), 1.29 (s, 8H, C(5,7-9)H<sub>2</sub>), 1.51–1.56 (m, 2H, C(6)H<sub>2</sub>), 1.51–1.56 (m, 1H(A), C(4)H<sub>2</sub>), 1.61–1.66 (m, 1H(B), C(4)H<sub>2</sub>), 2.22 (t, *J* = 13.0 Hz, 1H(A), C(3)H<sub>2</sub>), 2.47–2.54 (m, 1H(B), C(3)H<sub>2</sub>). <sup>13</sup>C-<sup>1</sup>H} NMR (500 MHz, CDCl<sub>3</sub>): δ = 1.88 (C(11)), 14.12 (C(10)), 22.68 (C(9)), 28.83 (C(4)), 29.26 (C(5)), 29.28 (C(7)), 30.18 (C(6)), 31.84 (C(8)), 36.54 (C(3)), 100.56 (C(1)), 163.72 (C(2)). MS (EI): *m/z*, % = 675 (<1) [M<sup>+</sup>], 547 (7), 273 (11), 207 (100), 191 (11), 133 (9), 96 (16), 73 (88), 40 (13). C<sub>26</sub>H<sub>52</sub>I<sub>2</sub>Si<sub>2</sub> Calc. C 46.29, H 7.77; CHN analysis, C 46.5, H 7.7.

4.2.9. ((1*E*,3*E*)-2,3-diphenylbuta-1,3-diene-1,4-diyl)bis(trimethylsilane) (**2e**) [5]. Yield: 106 mg (61%); R<sub>f</sub> = 0.7 (hexane). <sup>1</sup>H NMR (500 MHz, CDCl<sub>3</sub>): δ = -0.28 (s, 9H, C(7)H<sub>3</sub>), 5.48 (s, 1H, C(1)H), 7.22 (d, *J* = 6.9 Hz, 1H, C(4)H), 7.31–7.38 (m, 2H, C(5,6)H). <sup>13</sup>C-<sup>1</sup>H} NMR (500 MHz, CDCl<sub>3</sub>): δ = -0.28 (C(7)), 126.88 (C(6)), 127.57 (C(5)), 129.91 (C(4)), 133.90 (C(1)), 142.16 (C(3)), 159.87 (C(2)). MS (EI): *m/z*, % = 351 (7) [M<sup>+</sup>], 350 (20), 335 (7), 276 (13), 262 (21), 247 (28), 135 (18), 73 (100), 45 (12).

4.2.9. (1*Z*,2*Z*)-1,2-bis(iodo(trimethylsilyl)methylene)cyclohexane (**6**) [6]. Yield: 199 mg (79%); R<sub>f</sub> = 0.6 (hexane). IR (liquid film): 2953, 2930, 2896, 2854, 1567, 1460, 1442, 1421, 1406, 1250, 1075, 963, 936, 842, 758, 692, 627, 499 cm<sup>-1</sup>. <sup>1</sup>H NMR (500 MHz, CDCl<sub>3</sub>): δ = 0.33 (s, 9H, C(5)H<sub>3</sub>), 1.52 (t, *J* = 9.2 Hz, 1H(A), C(4)H<sub>3</sub>), 1.92 (s, 1H(B), C(4)H<sub>2</sub>), 2.21 (t, *J* = 12.0 Hz, 1H(A), C(3)H<sub>2</sub>), 2.88 (d, *J* = 12.0 Hz, 1H(B), C(3)H<sub>2</sub>). <sup>13</sup>C-<sup>1</sup>H} NMR (500 MHz, CDCl<sub>3</sub>): δ = 1.74 (C(5)), 29.13 (C(4)), 36.42 (C(3)), 101.65 (C(1)), 165.99 (C(2)). <sup>29</sup>Si-<sup>1</sup>H} (500 MHz, CDCl<sub>3</sub>): 0.95. MS (EI): *m/z*, % = 504 (<1) [M<sup>+</sup>], 377 (59), 289 (16), 161 (20), 97 (13), 73 (100), 45 (12).

4.2.10. (1*Z*,2*Z*)-1,2-bis(iodo(trimethylsilyl)methylene)cycloheptane (**7**). Yield: 279 mg (82%); R<sub>f</sub> = 0.6 (hexane). IR (liquid film): 2952, 2926, 2852, 1557, 1442, 1408, 1249, 1182, 1038, 899, 865, 839, 758, 693, 627, 480 cm<sup>-1</sup>. <sup>1</sup>H NMR (500 MHz, CDCl<sub>3</sub>): δ = 0.34 (s, 9H, C(5)H<sub>3</sub>), 1.47–1.52 (m, 2H(A), C(4,6)H<sub>3</sub>), 1.56–1.63 (m, 2H(B), C(4,6)H<sub>2</sub>), 2.39–2.47 (m, 1H(A), C(3)H<sub>2</sub>), 2.62–2.68 (m, 1H(B), C(3)H<sub>2</sub>). <sup>13</sup>C-<sup>1</sup>H}

NMR (500 MHz, CDCl<sub>3</sub>):  $\delta$  = 1.64 (C(5)), 26.91 (C(6)), 28.31 (C(4)), 34.26 (C(3)), 104.51 (C(1)), 165.88 (C(2)). MS (EI):  $m/z$ , % = 518 (1). <sup>29</sup>Si-<sup>1</sup>H} (500 MHz, CDCl<sub>3</sub>): 0.96. [M<sup>+</sup>], 391 (54), 358 (4), 303 (8), 175 (17), 131 (17), 97 (20), 73 (100), 40 (55). C<sub>15</sub>H<sub>28</sub>I<sub>2</sub>Si<sub>2</sub> Calc. C 34.76, H 5.44; CHN analysis, C 35.1, H 5.7.

## References

- (1) Brandsma, L.; Verkuijsse, H. D. *Synthesis of Acetylenes, Allenes, Cumulenes: A Laboratory Manual*; Elsevier SPC: Amsterdam-Oxford-New York, 1981.
- (2) Frisch, M. J. et al., "Gaussian 09, Revision A.1." Gaussian, Inc., Wallingford, CT, 2009.
- (3) Dzhemilev, U. M.; Ibragimov, A. G.; D'yakonov, V. A.; Zinnurova, R. A. First Synthesis of Magnesacyclopentadienes from Acetylenes by Treatment with BuMgHlg in the Presence of Zr Complexes. *Russ. J. Org. Chem.* **2007**, *43* (2), 176–180. <https://doi.org/10.1134/S1070428007020030>.
- (4) You, W.; Yan, X.; Liao, Q.; Xi, C. Cu-Catalyzed Double S-Alkenylation of Potassium Sulfide: A Highly Efficient Method for the Synthesis of Various Thiophenes. *Org. Lett.* **2010**, *12* (17), 3930–3933. <https://doi.org/10.1021/ol101619s>.
- (5) Xi, Z.; Liu, X.; Lu, J.; Bao, F.; Fan, H.; Li, Z.; Takahashi, T. Synthesis of 1,1,4,4-Tetrabromo-2-Butenes and Related Compounds via Desilylation–Bromination of Silylated 1,3-Butadiene Derivatives. *J. Org. Chem.* **2004**, *69* (24), 8547–8549. <https://doi.org/10.1021/jo048940f>.
- (6) D'Yakonov, V. A.; Tuktarova, R. A.; Dzhemilev, U. M. Synthesis and Transformations of Metallacycles 38. the Cp<sub>2</sub>ZrCl<sub>2</sub>-Catalyzed Cyclometallation of  $\alpha,\alpha$ -Diyne upon the Action of RMgR' or RnAlCl<sub>3</sub>-N. *Russ. Chem. Bull.* **2011**, *60* (8), 1633–1639. <https://doi.org/10.1007/s11172-011-0244-2>.

**Table 1.** The calculated free Gibbs energies and imaginary frequencies at B3LYP/6-31G\*/LANL2DZ level of theory in gas phase.

| Structure                                                                           | $\Delta_f G^\circ$ at 298.15 K, Hartree | MDL Mol Format File                 |
|-------------------------------------------------------------------------------------|-----------------------------------------|-------------------------------------|
| 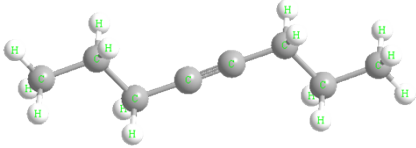   | -313.067115                             | 4-octyne.mol                        |
|    | -603.799991                             | trimethyl(pent-1-yn-1-yl)silane.mol |
|    | -1373.192070                            | intermediate_A.mol                  |
|  | -512.114157                             | intermediate_B.mol                  |
|  | -1686.255530                            | C1.mol                              |

|                                                                                     |              |             |
|-------------------------------------------------------------------------------------|--------------|-------------|
| 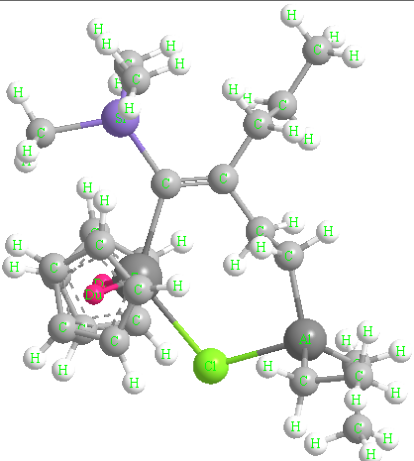   | -1976.969971 | C2.mol      |
|   | -1059.721081 | D1.mol      |
|  | -1641.157660 | D2.mol      |
|  | -861.063077  | Et2AlCl.mol |

|                                                                                   |              |                                          |
|-----------------------------------------------------------------------------------|--------------|------------------------------------------|
| 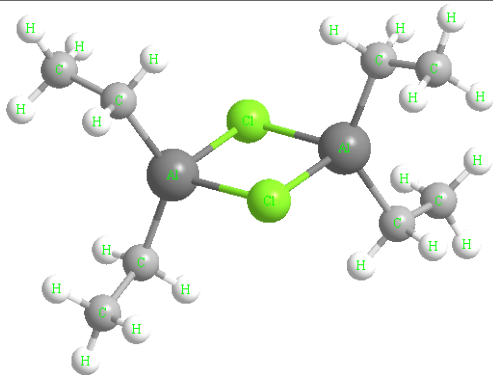 | -1722.137502 | (Et <sub>2</sub> AlCl) <sub>2</sub> .mol |
|  | -7.557119    | ethylene.mol                             |

**Table 2.** Quantum chemical calculations at B3LYP/6-31G\*/LANL2DZ level of theory in gas phase. The standard Gibbs energy is given at 298.15 K.

- r1:** (Intermediate A) + alkyne = (Product of alkyne insertion) (A→C)  
**r2:** Cp<sub>2</sub>Zr(ethylene) + 2 alkyne = Zirconacyclopentadiene + ethylene (B→D)  
**r3:** (Intermediate A) = Cp<sub>2</sub>Zr(ethylene) + Et<sub>2</sub>AlCl (A→B)  
**r4:** (Intermediate A) + 2 alkyne = Zirconacyclopentadiene + ethylene + Et<sub>2</sub>AlCl (A→D)  
**r5:** (Intermediate A) = Cp<sub>2</sub>Zr(ethylene) + 0.5\*(Et<sub>2</sub>AlCl)<sub>2</sub> (A→B)  
**r6:** (Intermediate A) + 2 alkyne = Zirconacyclopentadiene + ethylene + 0.5\*(Et<sub>2</sub>AlCl)<sub>2</sub> (A→D)

| Alkyne                          | dG( <b>r1</b> ), kcal/mol | dG( <b>r2</b> ), kcal/mol | dG( <b>r4</b> ), kcal/mol | dG( <b>r6</b> ), kcal/mol |
|---------------------------------|---------------------------|---------------------------|---------------------------|---------------------------|
| 4-Octyne                        | 2.293548                  | -18.707944                | -9.398211                 | -12.958701                |
| Trimethyl(pent-1-yn-1-yl)silane | 13.861687                 | -0.401606                 | 8.908126                  | 5.347637                  |

$$dG(\mathbf{r3}) = 9.309733 \text{ kcal/mol}$$

$$dG(\mathbf{r5}) = 5.749243 \text{ kcal/mol}$$

**((1*E*,3*E*)-2,3-dibutylbuta-1,3-diene-1,4-diyl)bis(trimethylsilane) 2a.<sup>2</sup>**

<sup>1</sup>H NMR (500 MHz, CDCl<sub>3</sub>): δ = 0.14 (s, 9H, C(7)H<sub>3</sub>), 0.92 (t, *J* = 7.0 Hz, 3H, C(6)H<sub>3</sub>), 1.28–1.36 (m, 4H, C(4, 5)H<sub>2</sub>), 2.29 (t, *J* = 6.4 Hz, 2H, C(3)H<sub>2</sub>), 5.48 (s, 1H, C(1)H). <sup>13</sup>C-<sup>1</sup>H} NMR (500 MHz, CDCl<sub>3</sub>): δ = 0.36 (C(7)), 14.06 (C(6)), 22.93 (C(5)), 31.69 (C(4)), 33.74 (C(3)), 125.07 (C(1)), 160.67 (C(2)). <sup>29</sup>Si-<sup>1</sup>H} (500 MHz, CDCl<sub>3</sub>): -10.79.

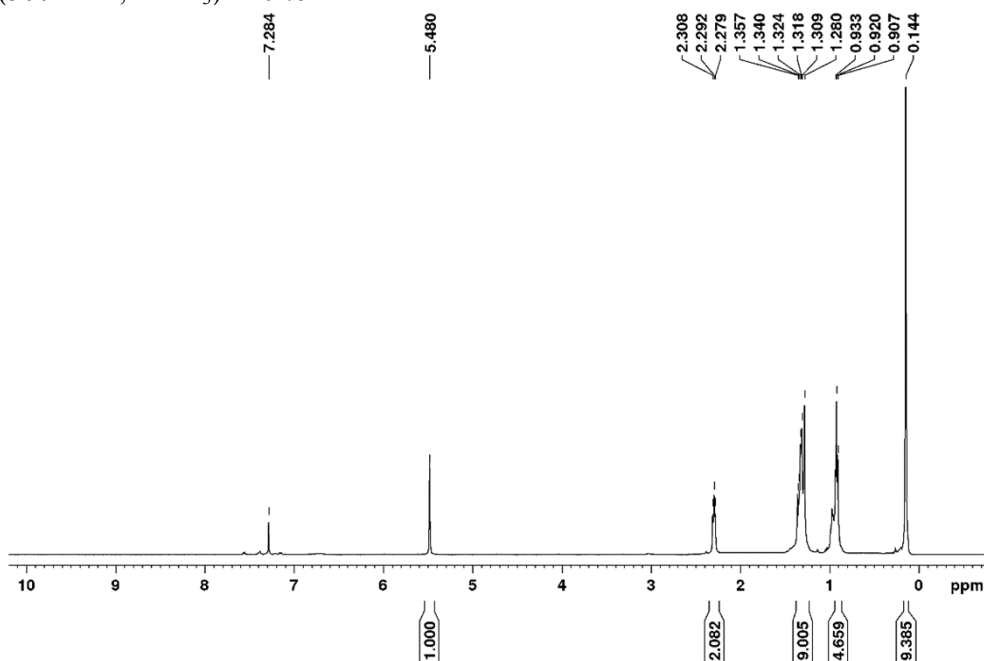

<sup>1</sup>H NMR of 2a

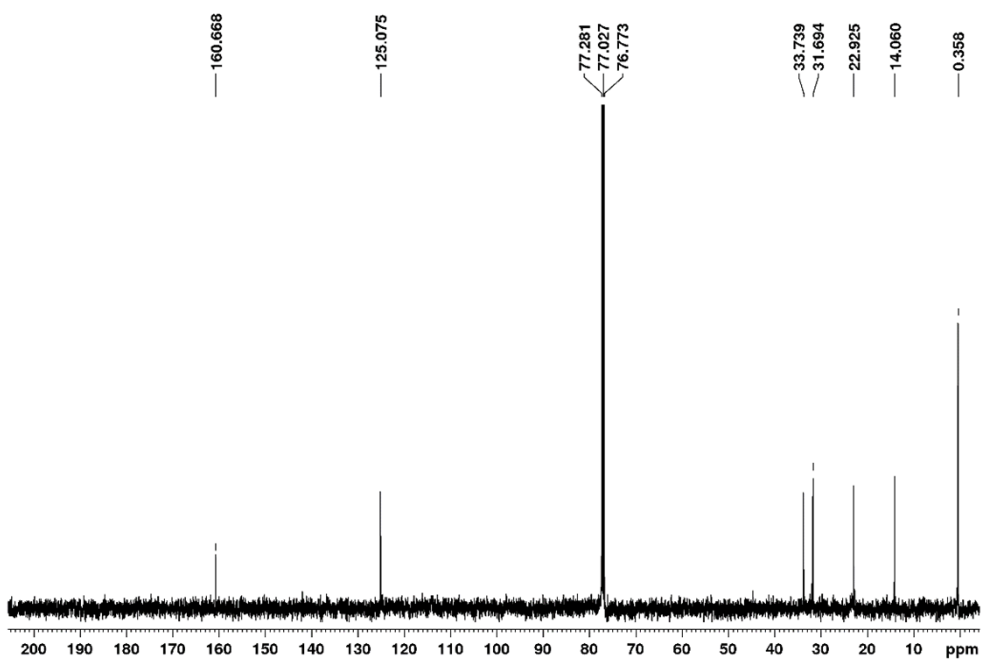

<sup>13</sup>C-<sup>1</sup>H} NMR of 2a



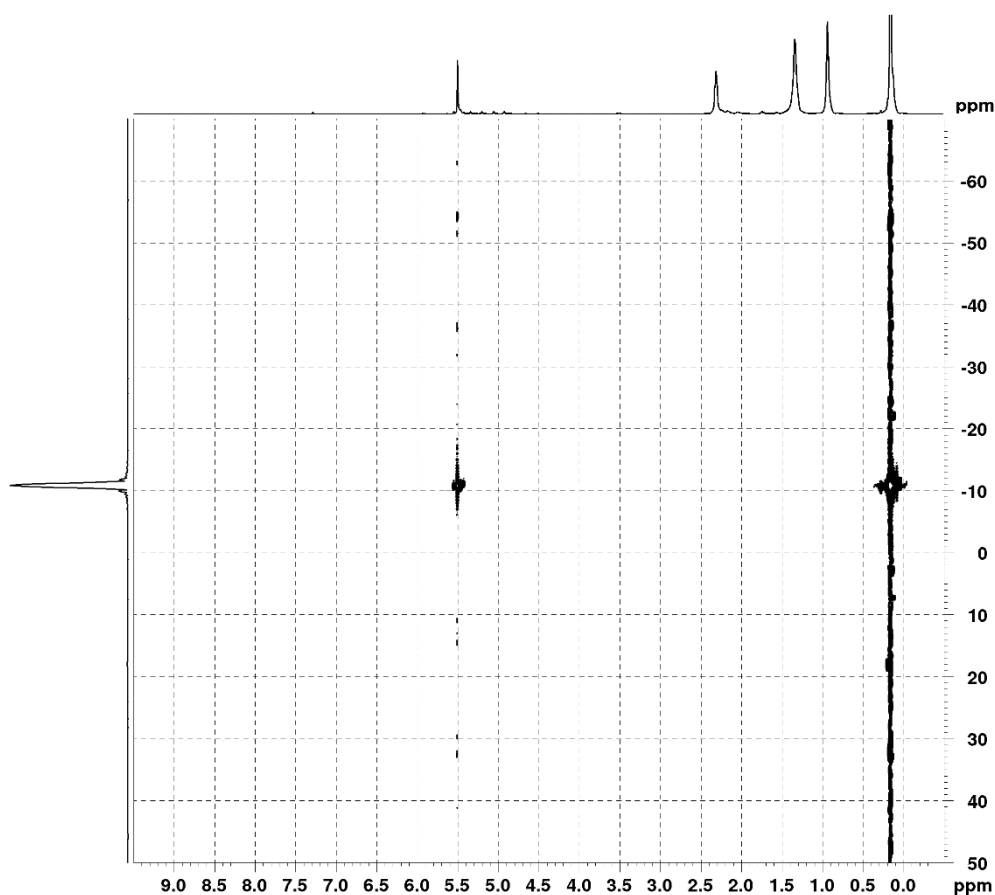

$^1\text{H} - ^{29}\text{Si}$  HMBC NMR of **2a**

**((1Z,3Z)-2,3-dibutyl-1,4-diiodobuta-1,3-diene-1,4-diyl)bis(trimethylsilane) 4a.**

$^1\text{H}$  NMR (500 MHz,  $\text{CDCl}_3$ ):  $\delta$  = 0.36 (s, 9H, C(7) $\text{H}_3$ ), 0.94 (t,  $J$  = 7.3 Hz,  $J$  = 14.5 Hz, 2H, C(5) $\text{H}_2$ ), 1.46–1.55 (m, 1H(A), 1H(B), C(4) $\text{H}_2$ ), 2.21 (t,  $J$  = 13.7 Hz, 1H(A), C(3) $\text{H}_2$ ), 2.52 (t,  $J$  = 13.7 Hz, 1H(B), C(3) $\text{H}_2$ ).  $^{13}\text{C}$ - $\{^1\text{H}\}$  NMR (500 MHz,  $\text{CDCl}_3$ ):  $\delta$  = 1.89 (C(7)), 13.83 (C(6)), 23.26 (C(5)), 30.84 (C(4)), 36.25 (C(3)), 108.67 (C(1)), 163.54 (C(2)).

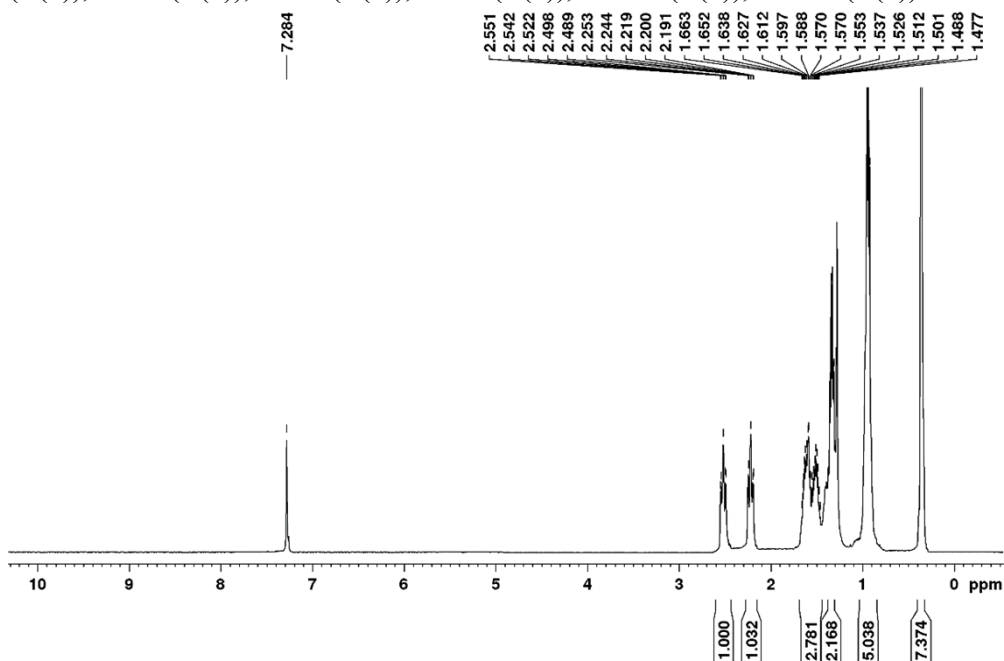

$^1\text{H}$  NMR of **4a**

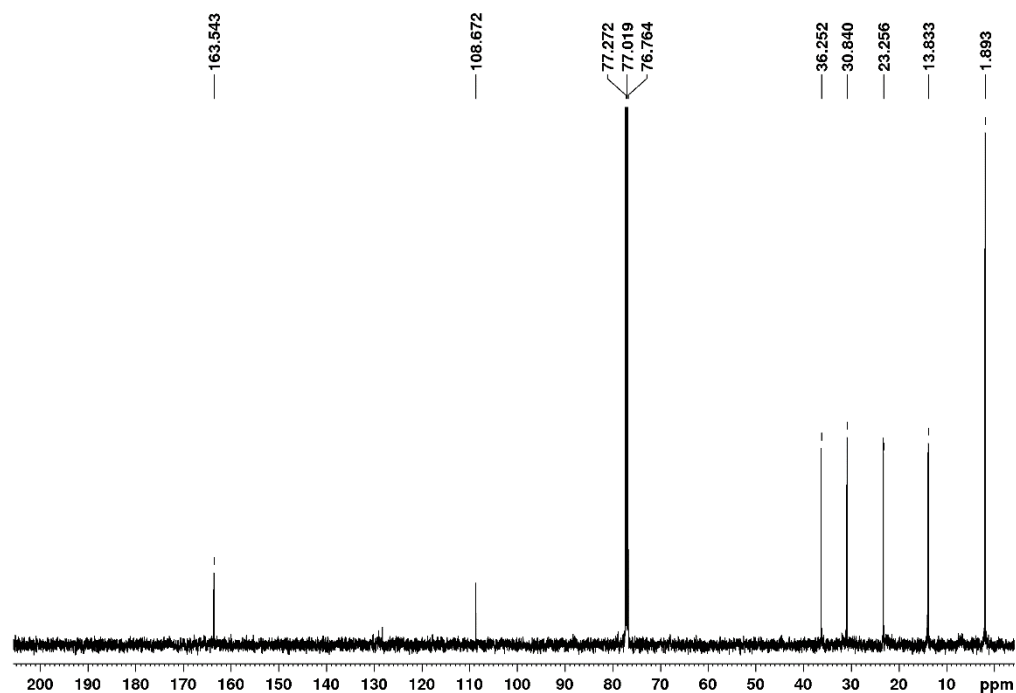

$^{13}\text{C}-\{^1\text{H}\}$  NMR of **4a**

**((1*E*,3*E*)-2,3-dipentylbuta-1,3-diene-1,4-diyl)bis(trimethylsilane) **2b**.**

$^1\text{H}$  NMR (500 MHz,  $\text{CDCl}_3$ ):  $\delta$  = 0.14 (s, 9H, C(8) $\text{H}_3$ ), 0.91 (t,  $J$  = 7.0 Hz, 3H, C(7) $\text{H}_3$ ), 1.28–1.35 (m, 6H, C(4, 5, 6) $\text{H}_2$ ), 2.29 (t,  $J$  = 6.0 Hz, 2H, C(3) $\text{H}_2$ ), 5.48 (s, 1H, C(1)H).  $^{13}\text{C}-\{^1\text{H}\}$  NMR (500 MHz,  $\text{CDCl}_3$ ):  $\delta$  = 0.35 (C(8)), 14.03 (C(7)), 22.54 (C(6)), 29.13 (C(4)), 32.03 (C(5)), 33.95 (C(3)), 125.10 (C(1)), 160.69 (C(2)).  $^{29}\text{Si}-\{^1\text{H}\}$  (500 MHz,  $\text{CDCl}_3$ ): -10.82.

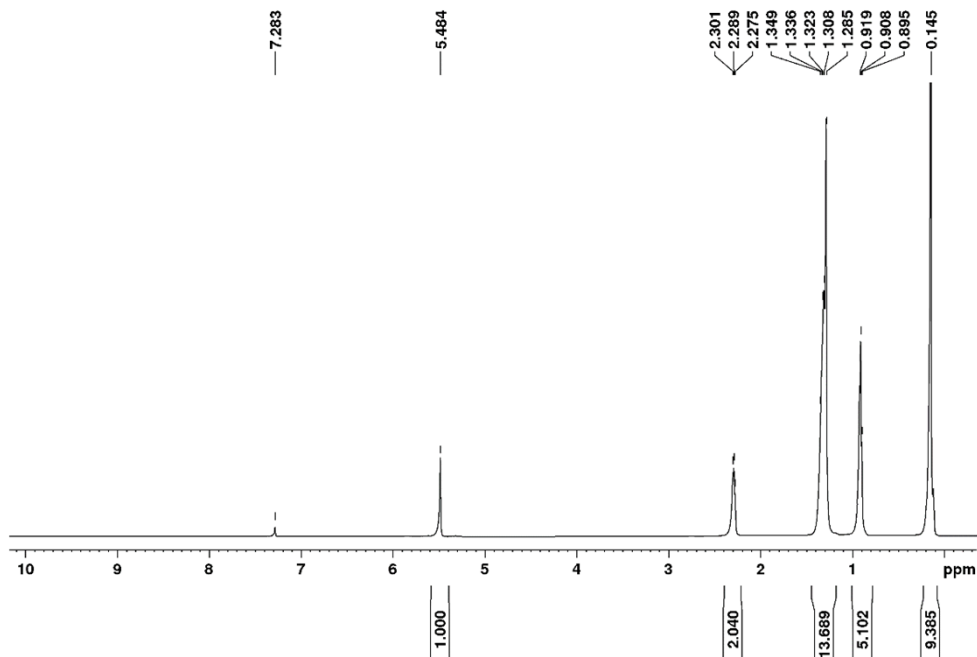

$^1\text{H}$  NMR of **2b**

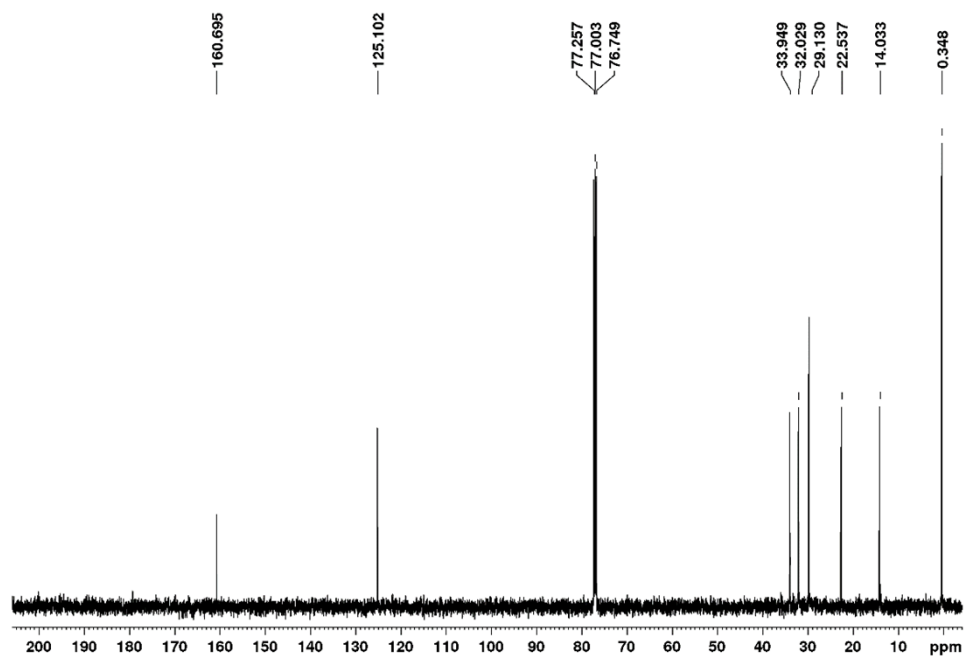

$^{13}\text{C}\{-^1\text{H}\}$  NMR of **2b**

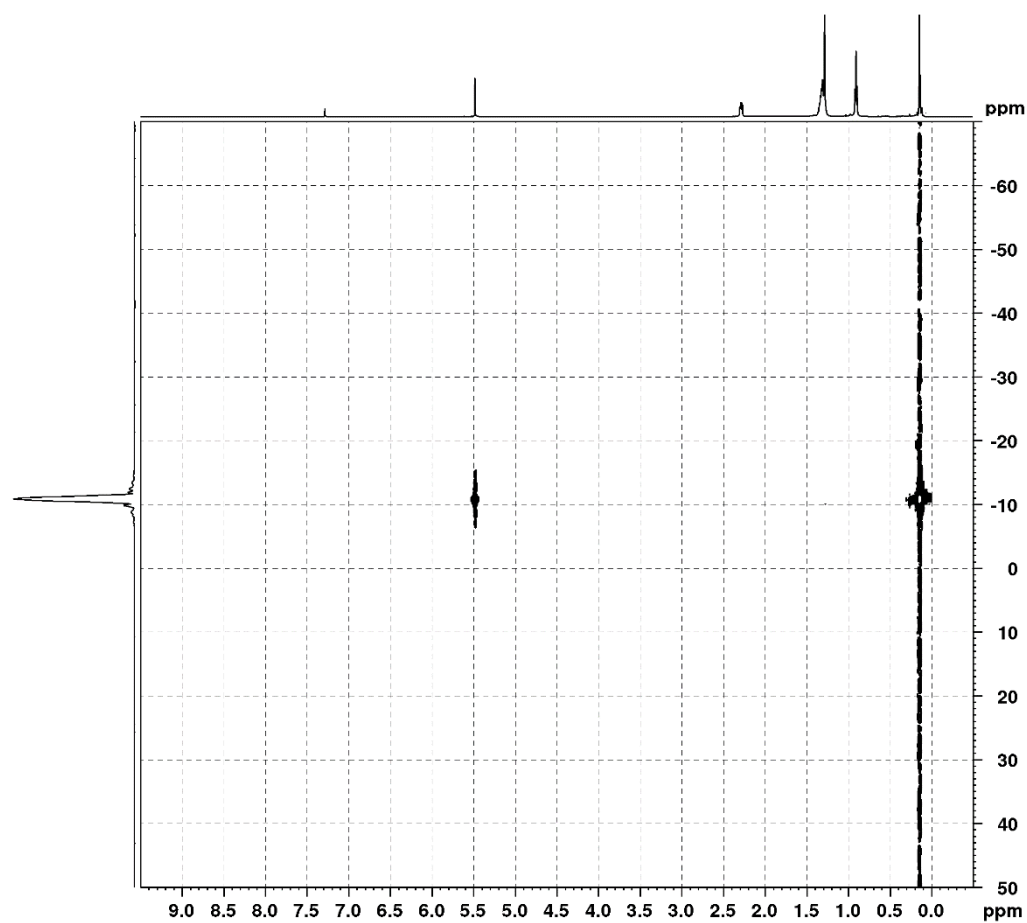

$^1\text{H} - ^{29}\text{Si}$  HMBC NMR of **2b**

**((1*E*,3*E*)-2,3-dipentylbuta-1,3-diene-1,4-diyl-1,4-d<sub>2</sub>)bis(trimethylsilane) 3b**

$^1\text{H}$  NMR (500 MHz,  $\text{CDCl}_3$ ):  $\delta$  = 0.14 (s, 9H, C(8) $\text{H}_3$ ), 0.91 (t,  $J$  = 6.7 Hz, 3H, C(7) $\text{H}_3$ ), 1.28–1.33 (m, 6H, C(4, 5, 6) $\text{H}_2$ ), 2.28 (t,  $J$  = 7.4 Hz, 2H, C(3) $\text{H}_2$ ), 5.48 (s, 1H, C(1)H).  $^{13}\text{C}\{-^1\text{H}\}$  NMR (500 MHz,  $\text{CDCl}_3$ ):  $\delta$

= 0.35 (C(8)), 14.04 (C(7)), 22.54 (C(6)), 29.14 (C(4)), 32.03 (C(5)), 32.95 (C(3)), 125.09 (C(1)), 160.60 (C(2)).  $^{29}\text{Si}-\{^1\text{H}\}$  (500 MHz,  $\text{CDCl}_3$ ): -10.84.

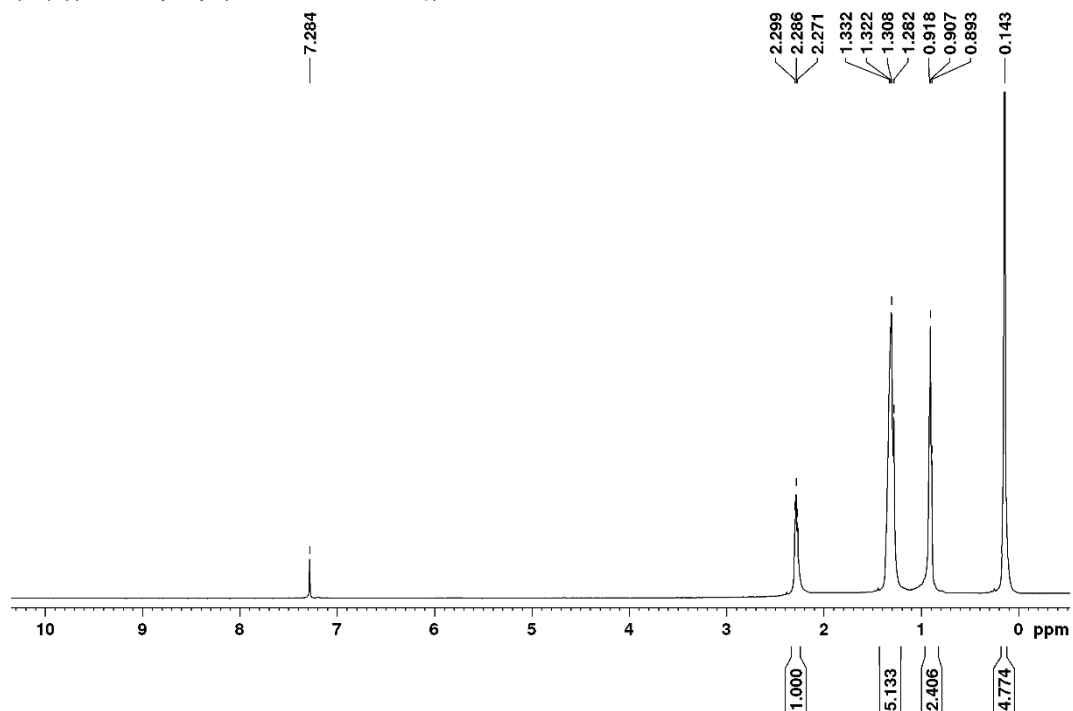

$^1\text{H}$  NMR of **3b**

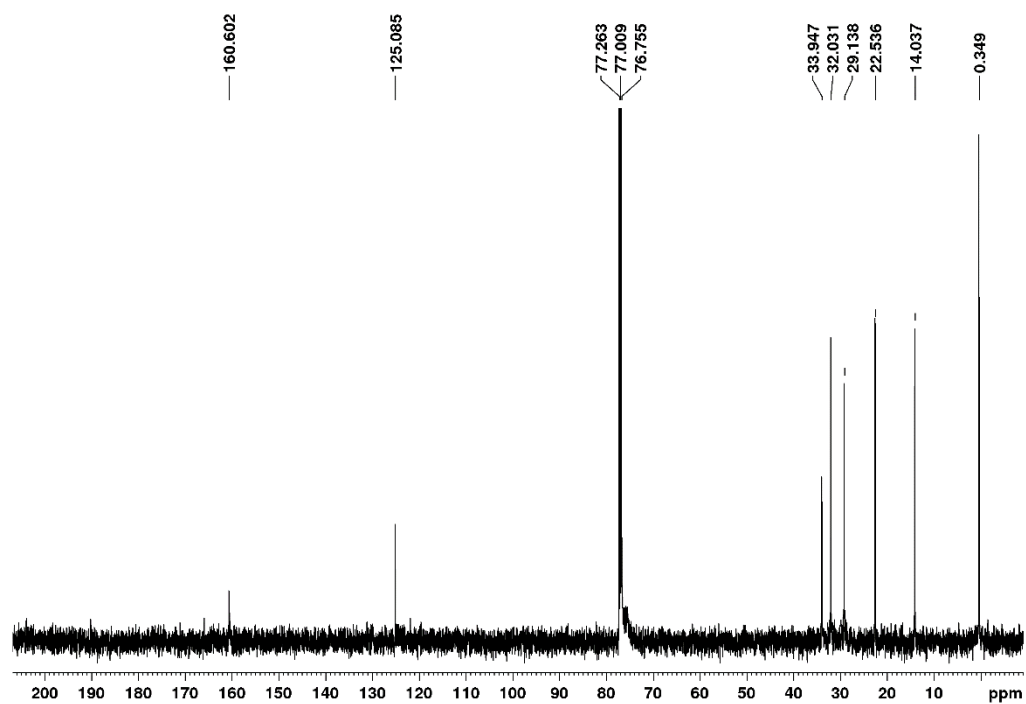

$^{13}\text{C}-\{^1\text{H}\}$  NMR of **3b**

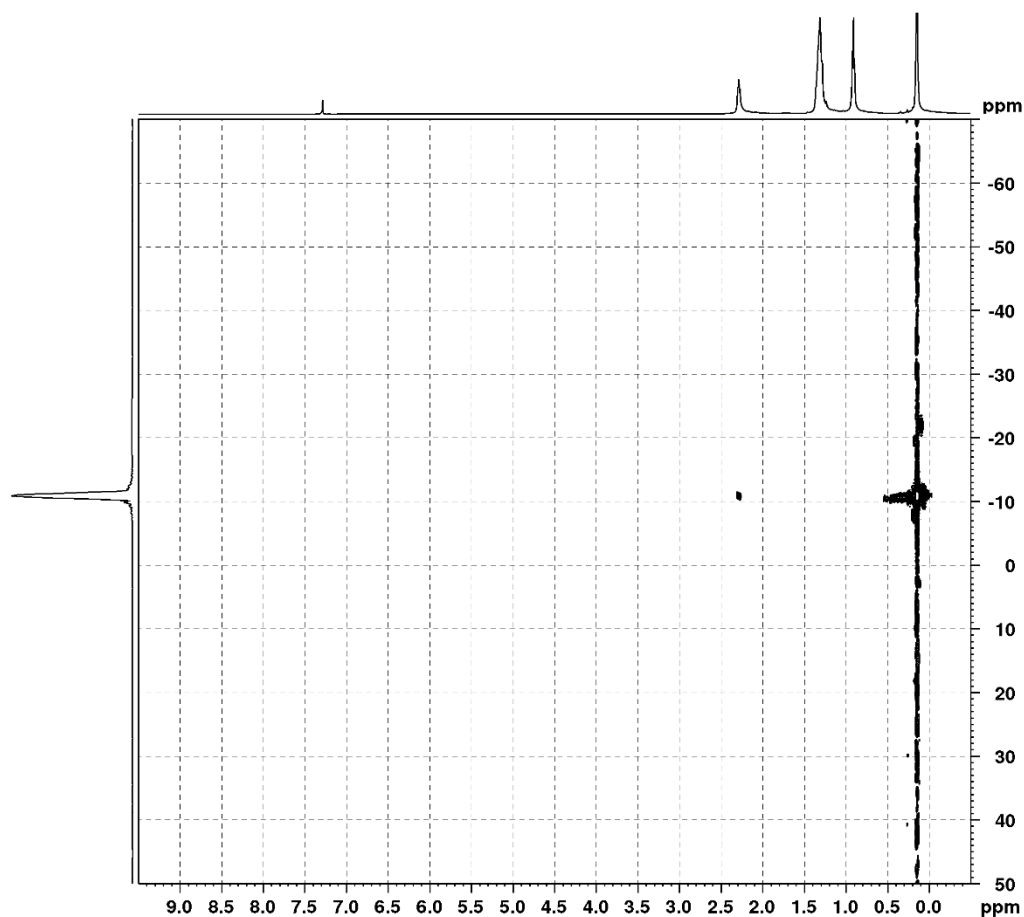

$^1\text{H}$  -  $^{29}\text{Si}$  HMBC NMR of **3b**

**((1Z,3Z)-1,4-diiodo-2,3-dipentylbuta-1,3-diene-1,4-diyl)bis(trimethylsilane) 4b**

$^1\text{H}$  NMR (500 MHz,  $\text{CDCl}_3$ ):  $\delta$  = 0.36 (s, 9H, C(8) $\text{H}_3$ ), 0.92 (t,  $J$  = 7.1 Hz, 3H, C(7) $\text{H}_3$ ), 1.28–1.31 (m, 2H, C(5) $\text{H}_2$ ), 1.33–1.37 (m, 2H, C(6) $\text{H}_2$ ), 1.50–1.56 (m, 1H(A), C(4) $\text{H}_2$ ), 1.62–1.67 (m, 1H(B), C(4) $\text{H}_2$ ), 2.22 (t,  $J$  = 13.2 Hz, 1H(A), C(3) $\text{H}_2$ ), 2.50 (t,  $J$  = 13.3 Hz, 1H(B), C(3) $\text{H}_2$ ).  $^{13}\text{C}$ - $\{^1\text{H}\}$  NMR (500 MHz,  $\text{CDCl}_3$ ):  $\delta$  = 1.88 (C(8)), 14.04 (C(7)), 22.38 (C(6)), 28.50 (C(4)), 32.35 (C(5)), 36.49 (C(3)), 108.58 (C(1)), 163.68 (C(2)).  $^{29}\text{Si}$ - $\{^1\text{H}\}$  (500 MHz,  $\text{CDCl}_3$ ): 0.93.

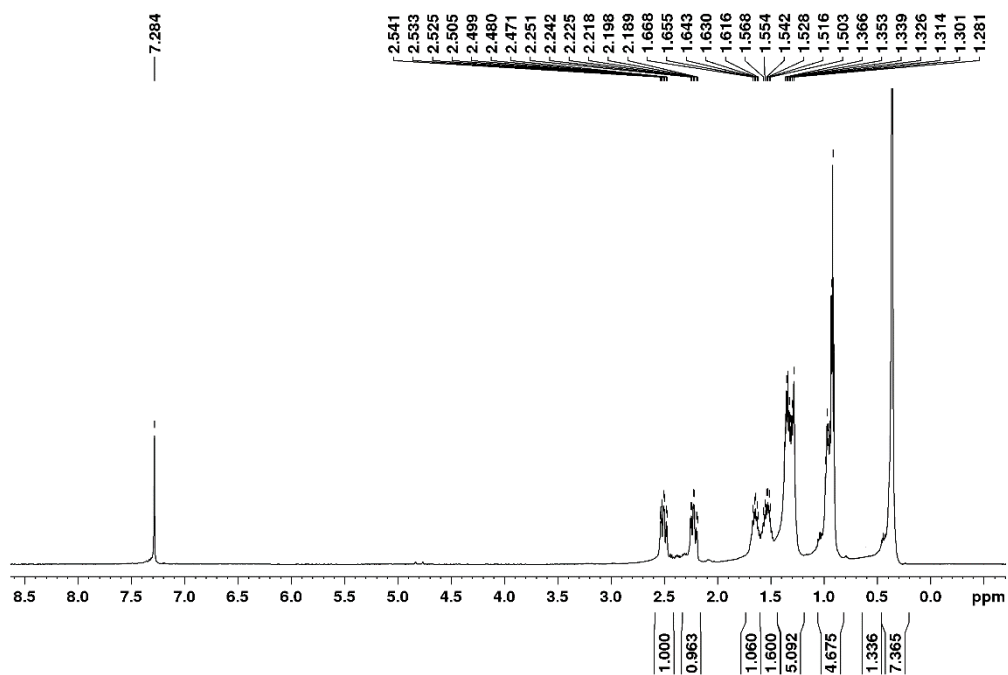

$^1\text{H}$  NMR of **4b**

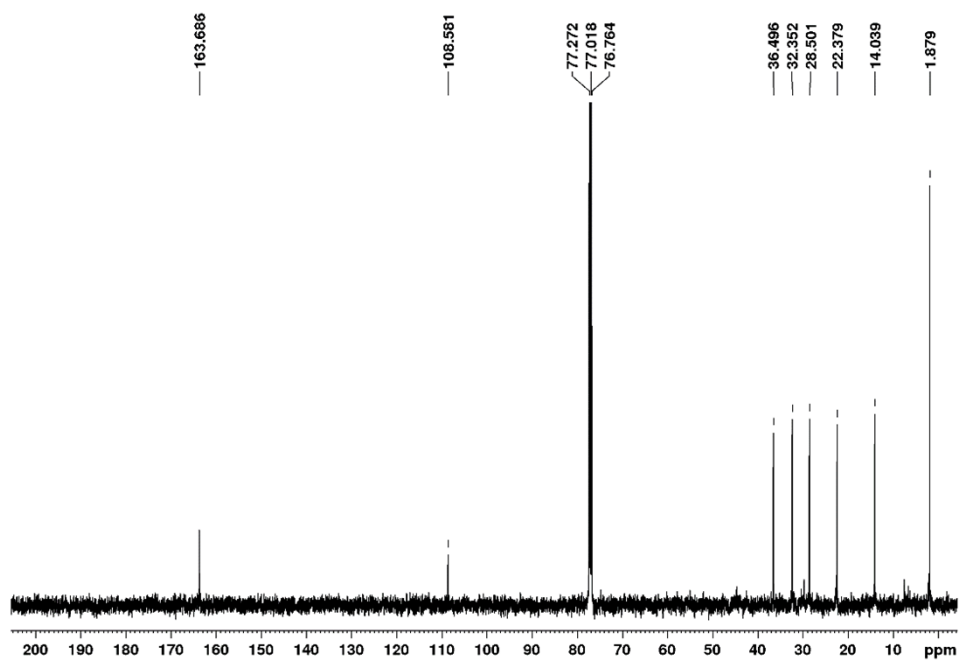

$^{13}\text{C}\{-^1\text{H}\}$  NMR of **4b**

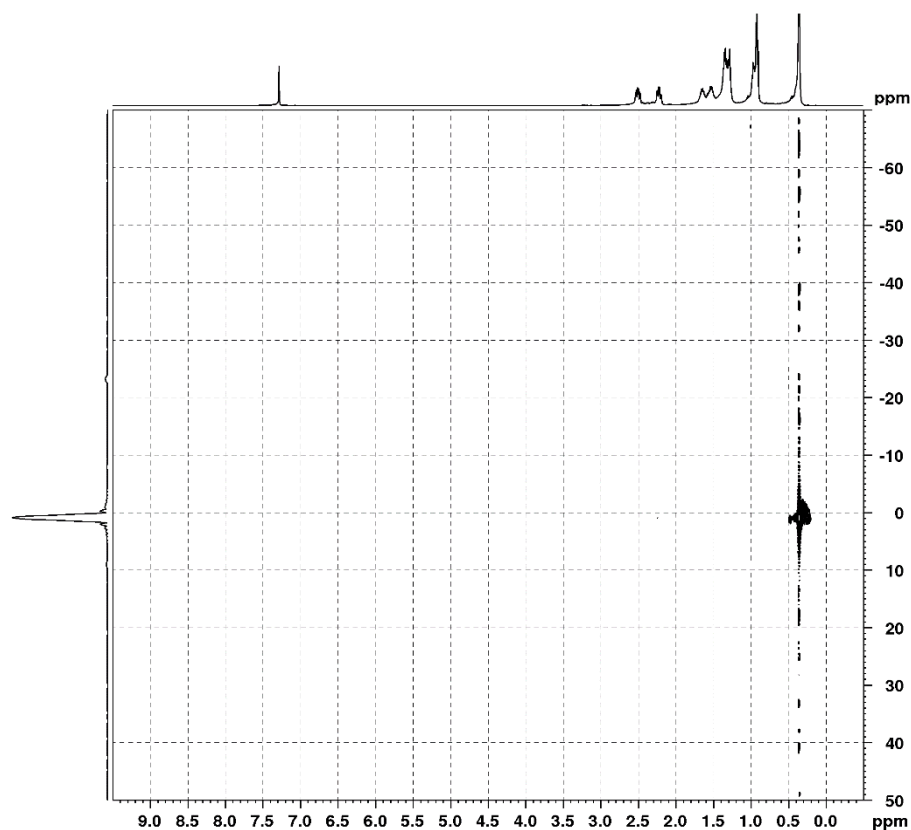

$^1\text{H}$  -  $^{29}\text{Si}$  HMBC NMR of **4b**

**((1*E*,3*E*)-2,3-dihexylbuta-1,3-diene-1,4-diyl)bis(trimethylsilane) **2c**.**

$^1\text{H}$  NMR (500 MHz,  $\text{CDCl}_3$ ):  $\delta$  = 0.14 (s, 9H, C(9) $\text{H}_3$ ), 0.91 (t,  $J$  = 6.9 Hz, 3H, C(8) $\text{H}_3$ ), 1.28–1.33 (m, 8H, C(4, 5, 6, 7) $\text{H}_2$ ), 2.29 (t,  $J$  = 7.3 Hz, 2H, C(3) $\text{H}_2$ ), 5.48 (s, 1H, C(1)H).  $^{13}\text{C}$ - $\{^1\text{H}\}$  NMR (500 MHz,  $\text{CDCl}_3$ ):  $\delta$  = 0.35 (C(9)), 14.06 (C(8)), 22.59 (C(7)), 29.40 (C(4)), 29.47 (C(5)), 31.73 (C(6)), 34.00 (C(3)), 125.10 (C(1)), 160.71 (C(2)).  $^{29}\text{Si}$ - $\{^1\text{H}\}$  (500 MHz,  $\text{CDCl}_3$ ): -10.84.

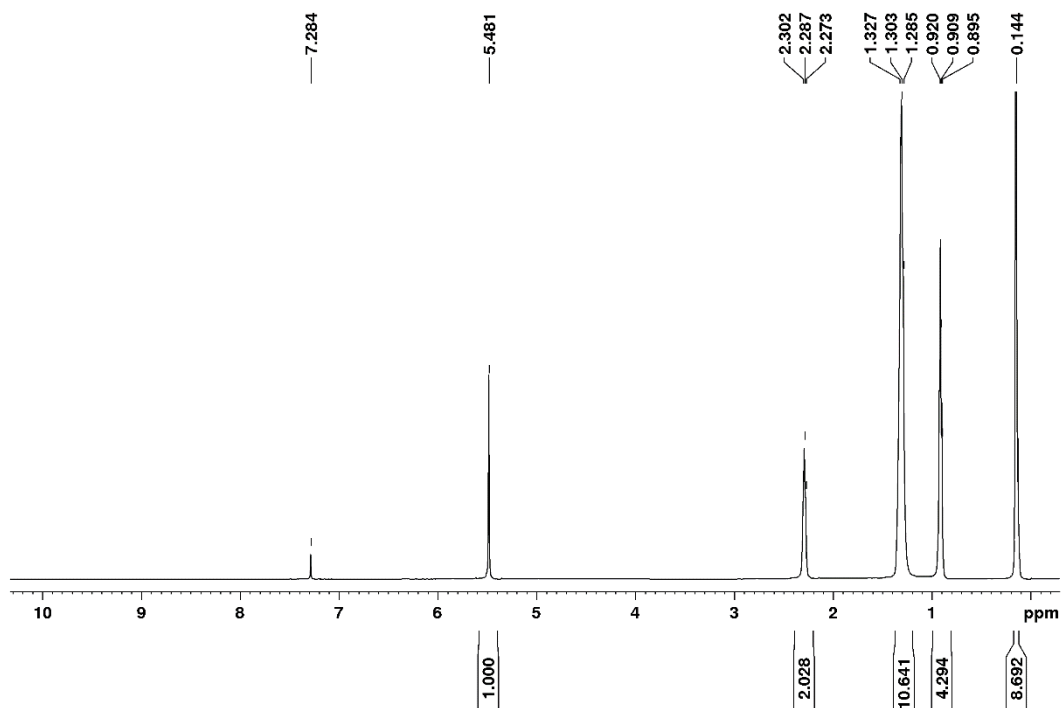

$^1\text{H}$  NMR of **2c**

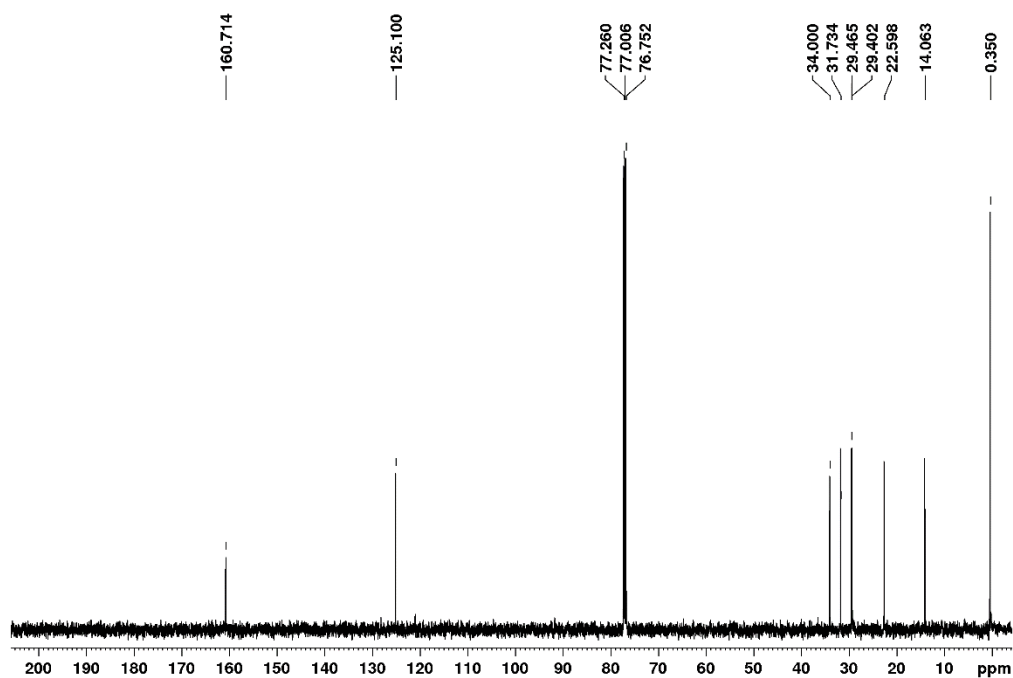

$^{13}\text{C}\{-^1\text{H}\}$  NMR of **2c**

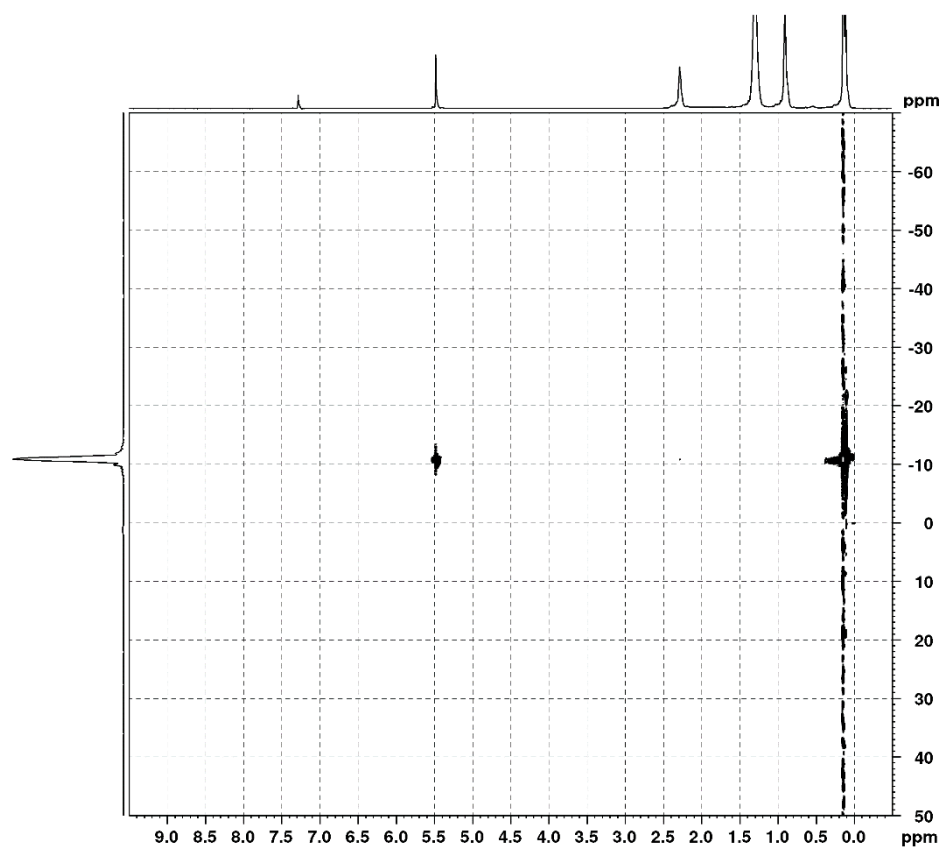

$^1\text{H} - ^{29}\text{Si}$  HMBC NMR of **2c**

**((1*E*,3*E*)-2,3-dioctylbuta-1,3-diene-1,4-diyl)bis(trimethylsilane) **2d****

$^1\text{H}$  NMR (500 MHz,  $\text{CDCl}_3$ ):  $\delta$  = 0.14 (s, 9H, C(11) $\text{H}_3$ ), 0.91 (t,  $J$  = 7.2 Hz, 3H, C(10) $\text{H}_3$ ), 1.29 (s, 12H, C(4-9) $\text{H}_2$ ), 2.29 (t,  $J$  = 7.8 Hz, 2H, C(3) $\text{H}_2$ ), 5.48 (s, 1H, C(1)H).  $^{13}\text{C}\{-^1\text{H}\}$  NMR (500 MHz,  $\text{CDCl}_3$ ):  $\delta$  = 0.36 (C(11)), 14.12 (C(10)), 22.69 (C(9)), 29.26 (C(4)), 29.44 (C(5)), 29.49 (C(7)), 29.80 (C(6)), 31.89 (C(8)), 33.99 (C(3)), 125.08 (C(1)), 160.71 (C(2)).  $^{29}\text{Si}\{-^1\text{H}\}$  (500 MHz,  $\text{CDCl}_3$ ): -10.82.



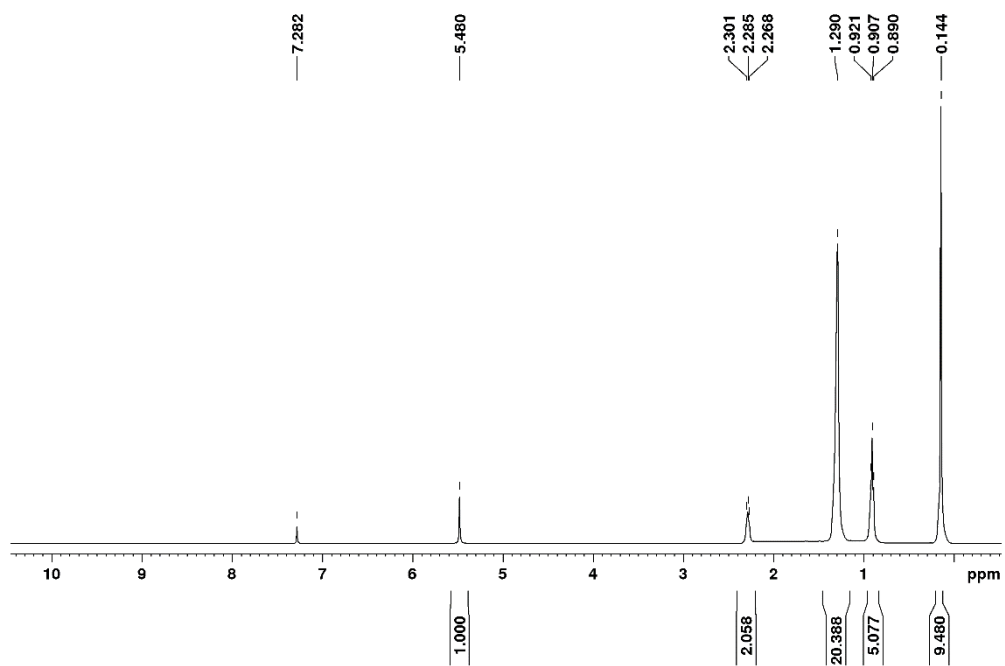

$^1\text{H}$  NMR of **2d**

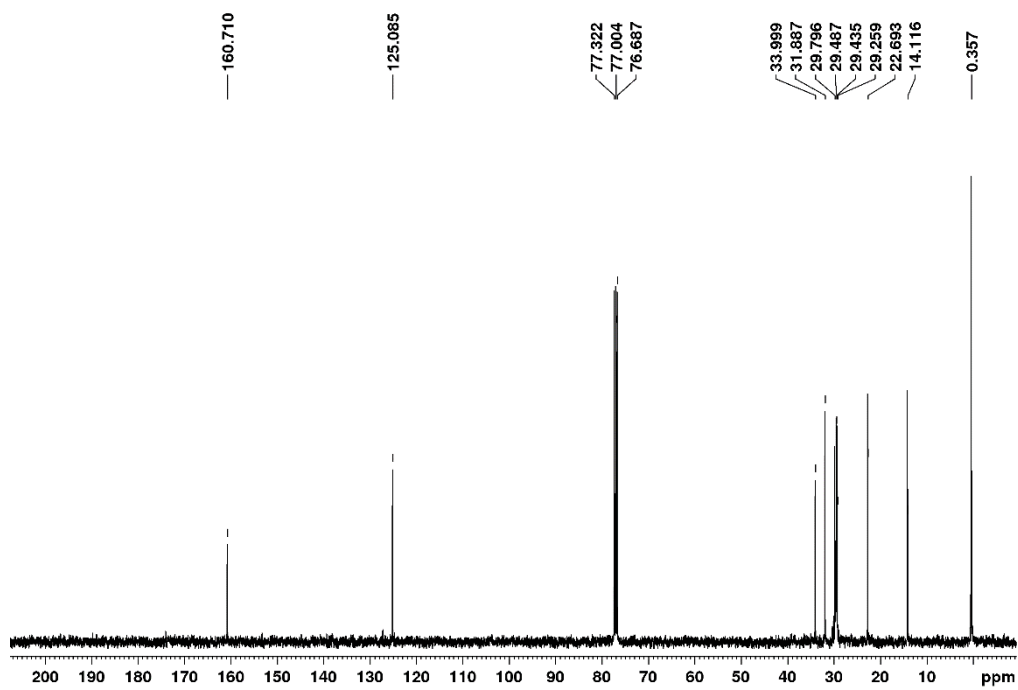

$^{13}\text{C}$ - $\{^1\text{H}\}$  NMR of **2d**

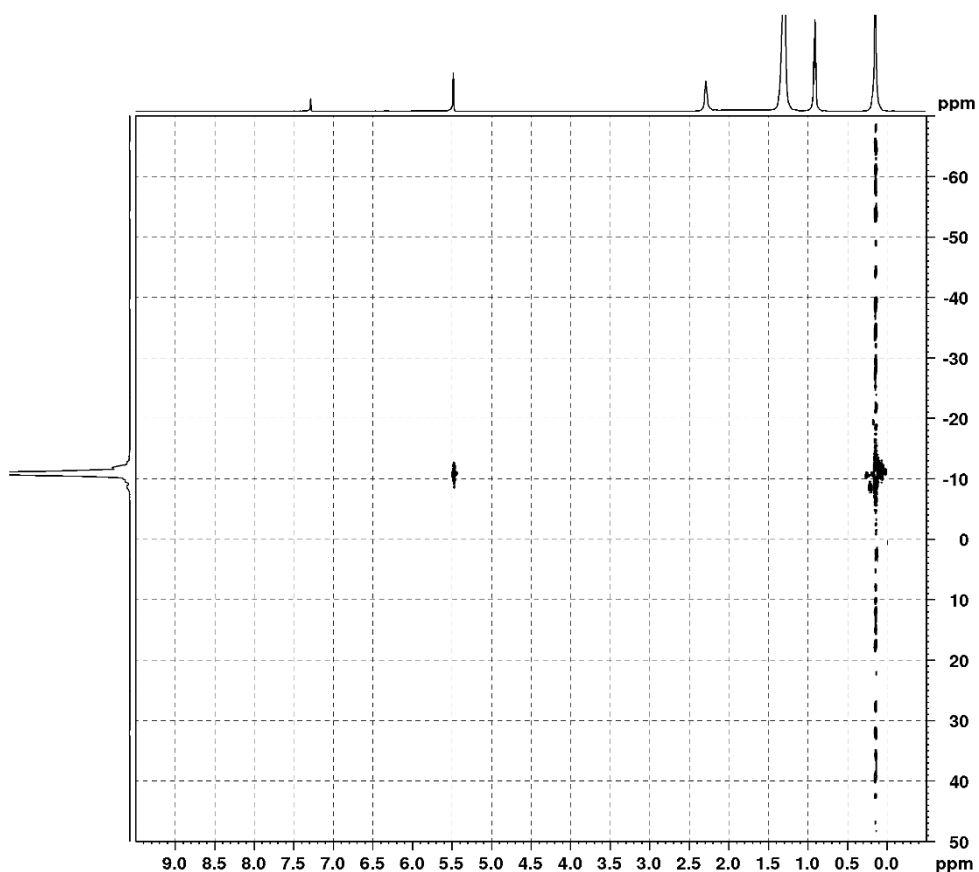

$^1\text{H} - ^{29}\text{Si}$  HMBC NMR of **2d**

**((1Z,3Z)-1,4-diiodo-2,3-dioctylbuta-1,3-diene-1,4-diyl)bis(trimethylsilane) 4d**

$^1\text{H}$  NMR (500 MHz,  $\text{CDCl}_3$ ):  $\delta$  = 0.36 (s, 9H, C(11) $\text{H}_3$ ), 0.91 (t,  $J$  = 6.9 Hz, 3H, C(10) $\text{H}_3$ ), 1.29 (s, 8H, C(5,7-9) $\text{H}_2$ ), 1.51–1.56 (m, 2H, C(6) $\text{H}_2$ ), 1.51–1.56 (m, 1H(A), C(4) $\text{H}_2$ ), 1.61–1.66 (m, 1H(B), C(4) $\text{H}_2$ ), 2.22 (t,  $J$  = 13.0 Hz, 1H(A), C(3) $\text{H}_2$ ), 2.47–2.54 (m, 1H(B), C(3) $\text{H}_2$ ).  $^{13}\text{C}$ - $\{^1\text{H}\}$  NMR (500 MHz,  $\text{CDCl}_3$ ):  $\delta$  = 1.88 (C(11)), 14.12 (C(10)), 22.68 (C(9)), 28.83 (C(4)), 29.26 (C(5)), 29.28 (C(7)), 30.18 (C(6)), 31.84 (C(8)), 36.54 (C(3)), 100.56 (C(1)), 163.72 (C(2)).

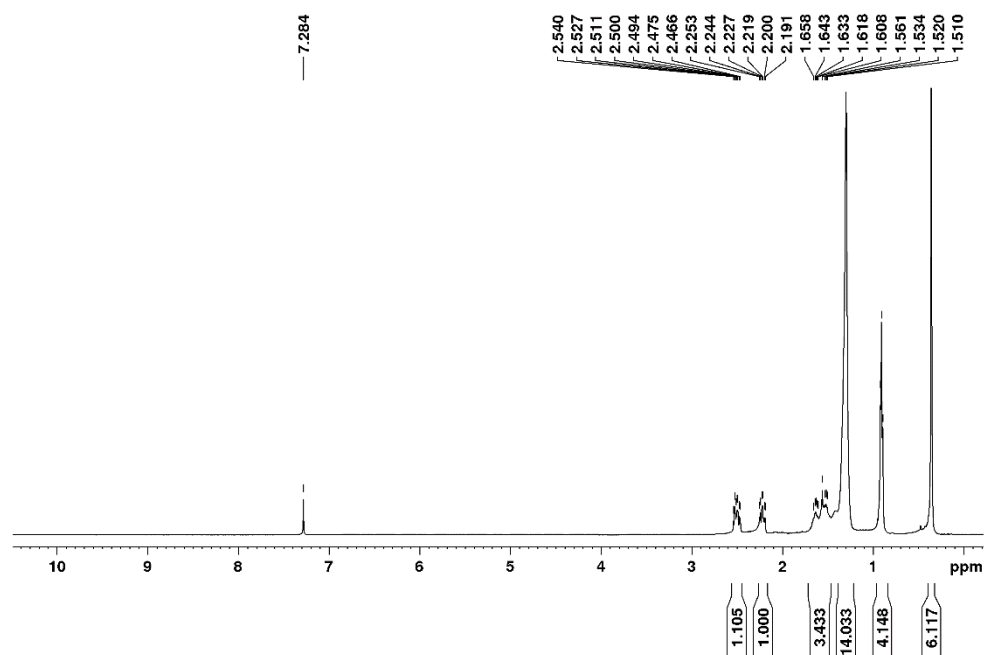

$^1\text{H}$  NMR of **4d**

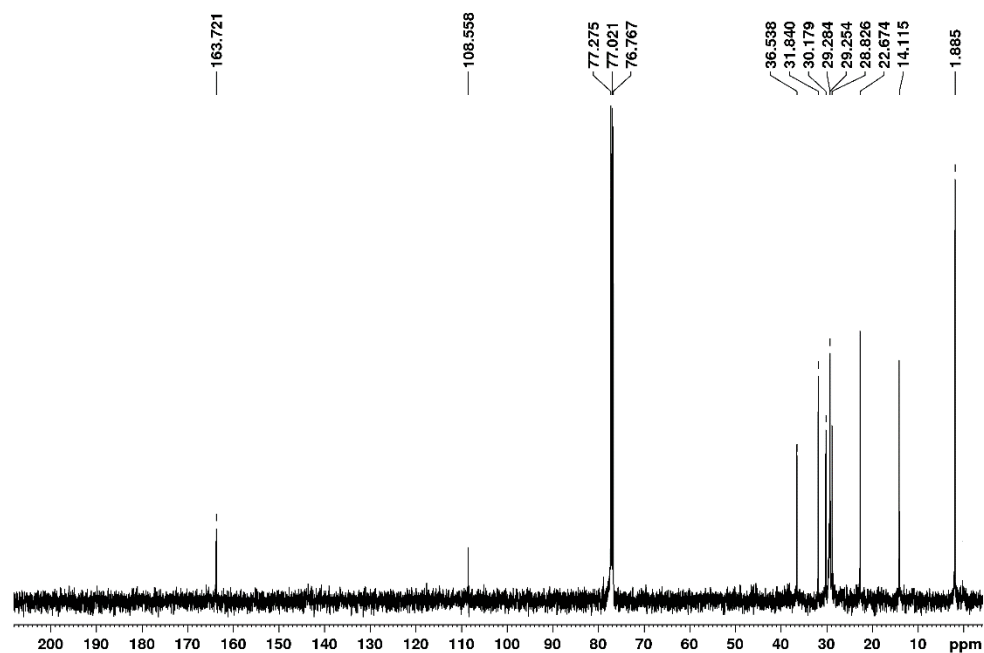

$^{13}\text{C}-\{^1\text{H}\}$  NMR of **4d**

**((1E,3E)-2,3-diphenylbuta-1,3-diene-1,4-diyl)bis(trimethylsilane) 2e.**

$^1\text{H}$  NMR (500 MHz,  $\text{CDCl}_3$ ):  $\delta = -0.28$  (s, 9H, C(7) $\text{H}_3$ ), 5.48 (s, 1H, C(1)H), 7.22 (d,  $J = 6.9$  Hz, 1H, C(4)H), 7.31–7.38 (m, 2H, C(5,6)H).  $^{13}\text{C}-\{^1\text{H}\}$  NMR (500 MHz,  $\text{CDCl}_3$ ):  $\delta = -0.28$  (C(7)), 126.88 (C(6)), 127.57 (C(5)), 129.91 (C(4)), 133.90 (C(1)), 142.16 (C(3)), 159.87 (C(2)).

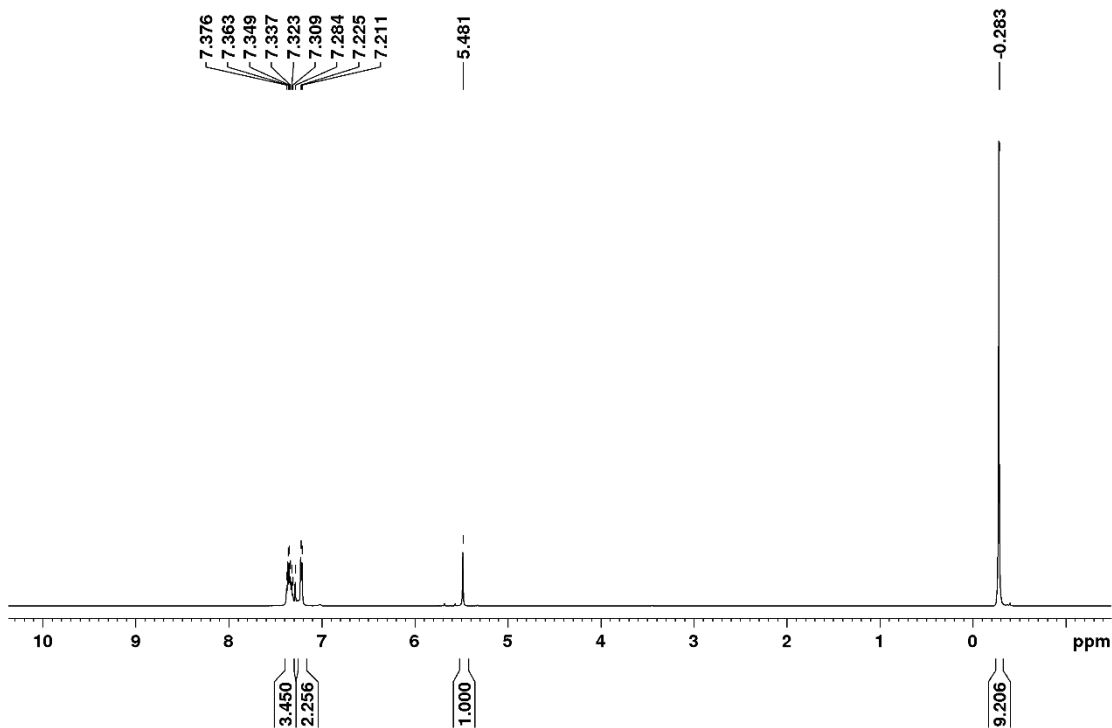

$^1\text{H}$  NMR of **2e**

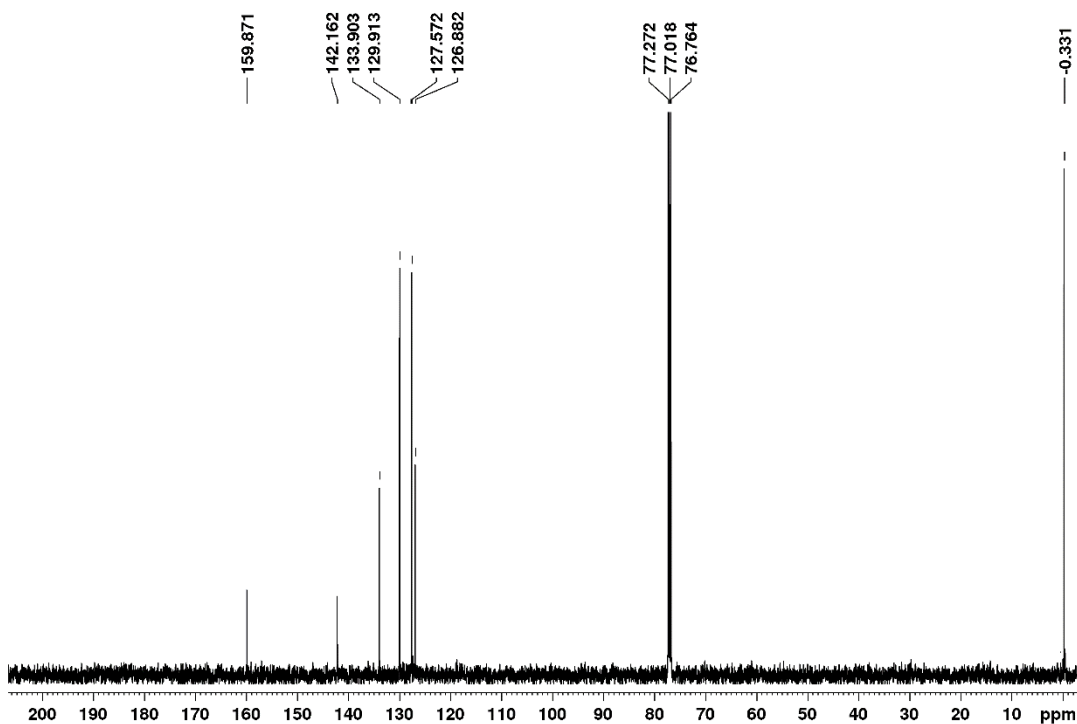

$^{13}\text{C}-\{^1\text{H}\}$  NMR of **2e**

**(1Z,2Z)-1,2-bis(iodo(trimethylsilyl)methylene)cyclohexane (6).**<sup>5</sup>

$^1\text{H}$  NMR (500 MHz,  $\text{CDCl}_3$ ):  $\delta$  = 0.33 (s, 9H, C(5) $\text{H}_3$ ), 1.52 (t,  $J$  = 9.2 Hz, 1H(A), C(4) $\text{H}_3$ ), 1.92 (s, 1H(B), C(4) $\text{H}_2$ ), 2.21 (t,  $J$  = 12.0 Hz, 1H(A), C(3) $\text{H}_2$ ), 2.88 (d,  $J$  = 12.0 Hz, 1H(B), C(3) $\text{H}_2$ ).  $^{13}\text{C}-\{^1\text{H}\}$  NMR (500 MHz,  $\text{CDCl}_3$ ):  $\delta$  = 1.74 (C(5)), 29.13 (C(4)), 36.42 (C(3)), 101.65 (C(1)), 165.99 (C(2)).  $^{29}\text{Si}-\{^1\text{H}\}$  (500 MHz,  $\text{CDCl}_3$ ): 0.95.

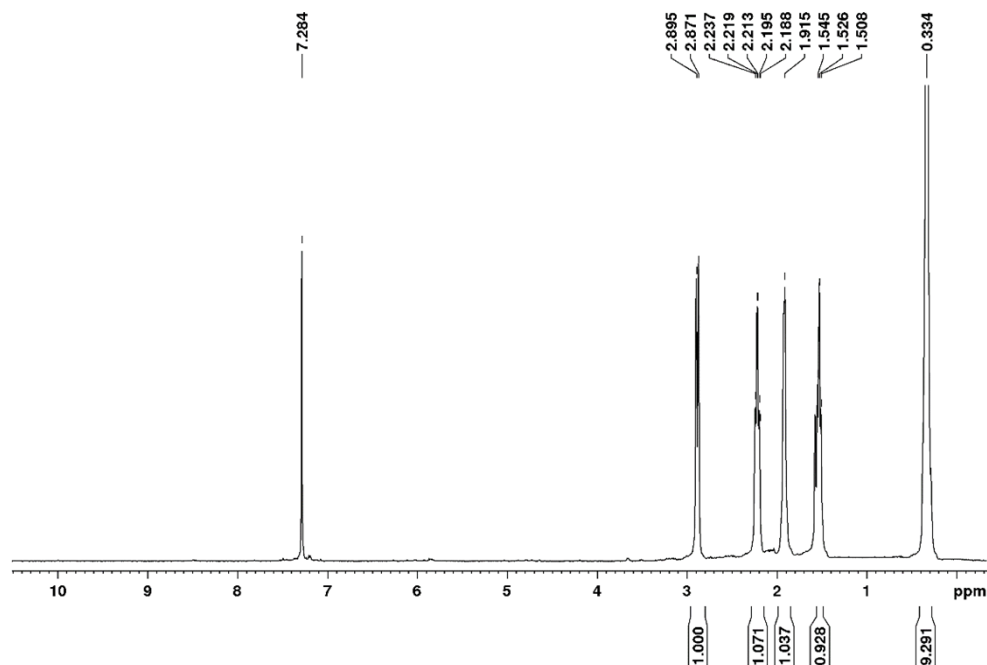

$^1\text{H}$  NMR of **6**

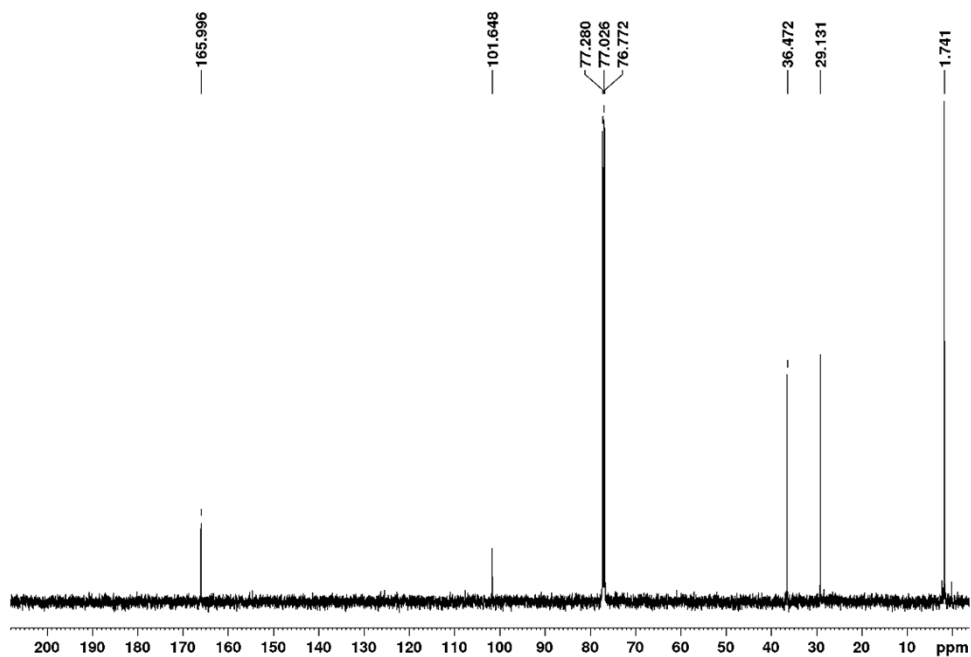

$^{13}\text{C}\{-^1\text{H}\}$  NMR of **6**

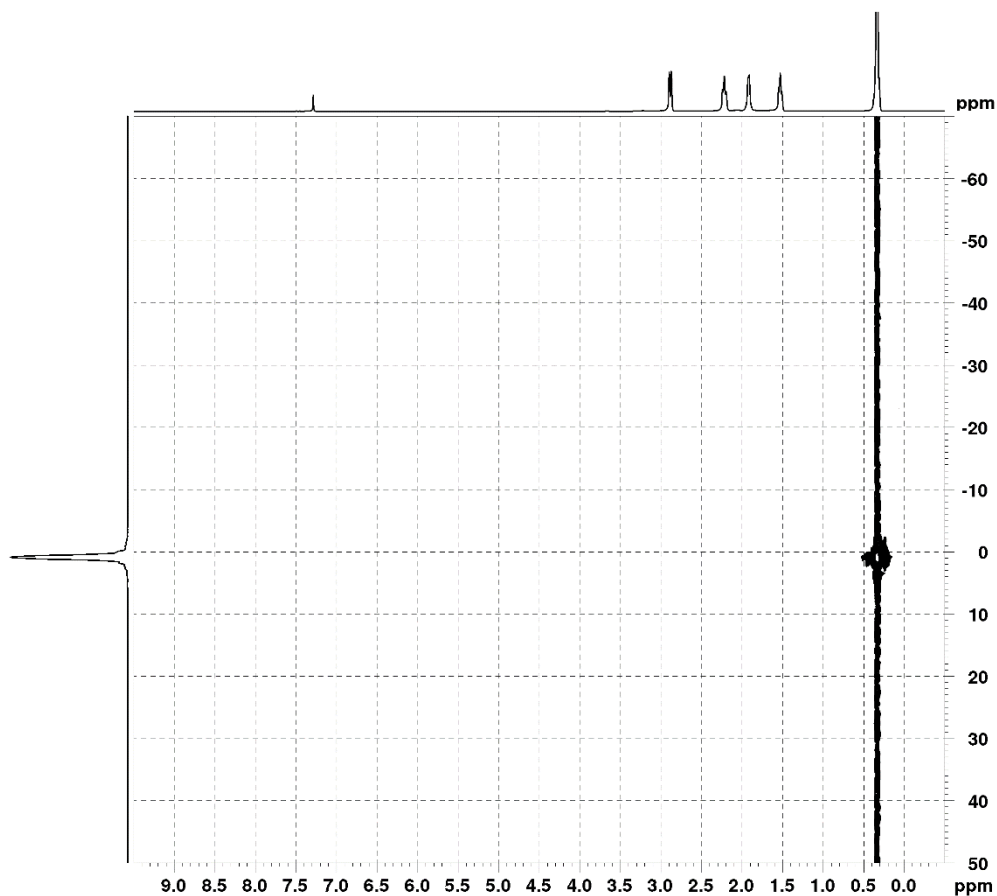

$^1\text{H} - ^{29}\text{Si}$  HMBC NMR of **6**

**(1Z,2Z)-1,2-bis(iodo(trimethylsilyl)methylene)cycloheptane (7)**

$^1\text{H}$  NMR (500 MHz,  $\text{CDCl}_3$ ):  $\delta$  = 0.34 (s, 9H, C(5) $\text{H}_3$ ), 1.47–1.52 (m, 2H(A), C(4,6) $\text{H}_3$ ), 1.56–1.63 (m, 2H(B), C(4,6) $\text{H}_2$ ), 2.39–2.47 (m, 1H(A), C(3) $\text{H}_2$ ), 2.62 – 2.68 (m, 1H(B), C(3) $\text{H}_2$ ).  $^{13}\text{C}\{-^1\text{H}\}$  NMR (500

MHz, CDCl<sub>3</sub>):  $\delta$  = 1.64 (C(5)), 26.91 (C(6)), 28.31 (C(4)), 34.26 (C(3)), 104.51 (C(1)), 165.88 (C(2)). MS (EI): m/z, % = 518 (1). <sup>29</sup>Si-<sup>1</sup>H} (500 MHz, CDCl<sub>3</sub>): 0.96.

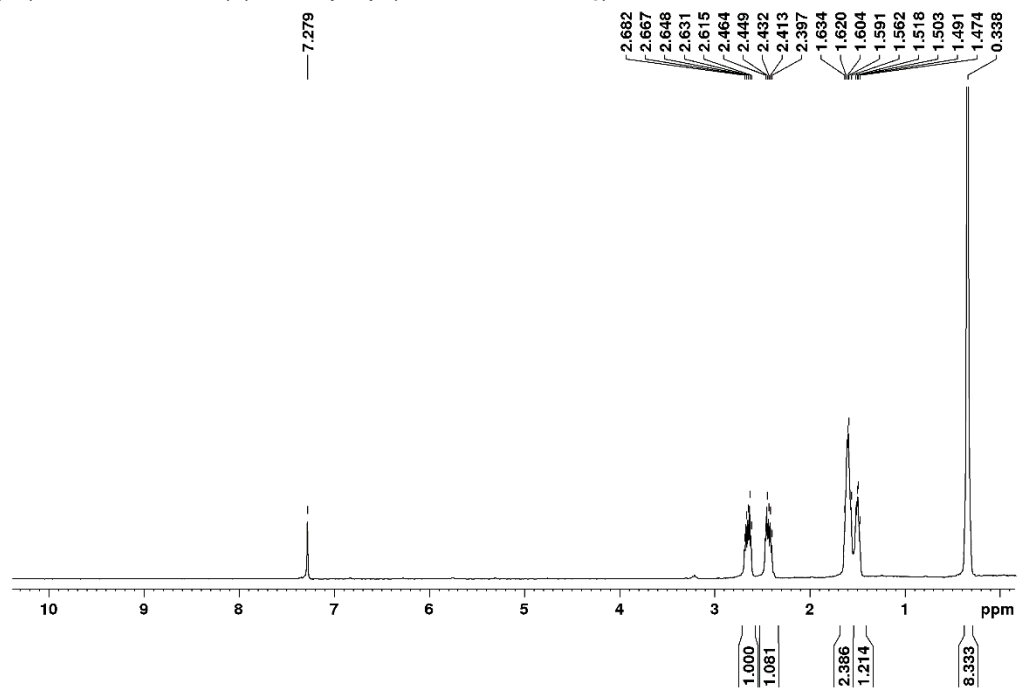

<sup>1</sup>H NMR of 7

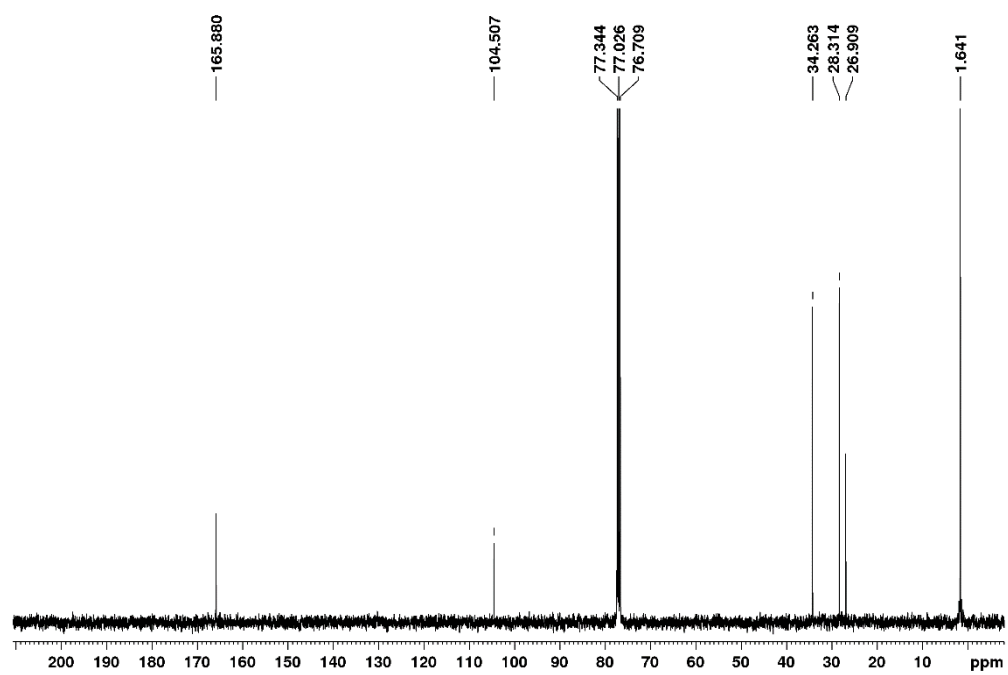

<sup>13</sup>C-<sup>1</sup>H} NMR of 7

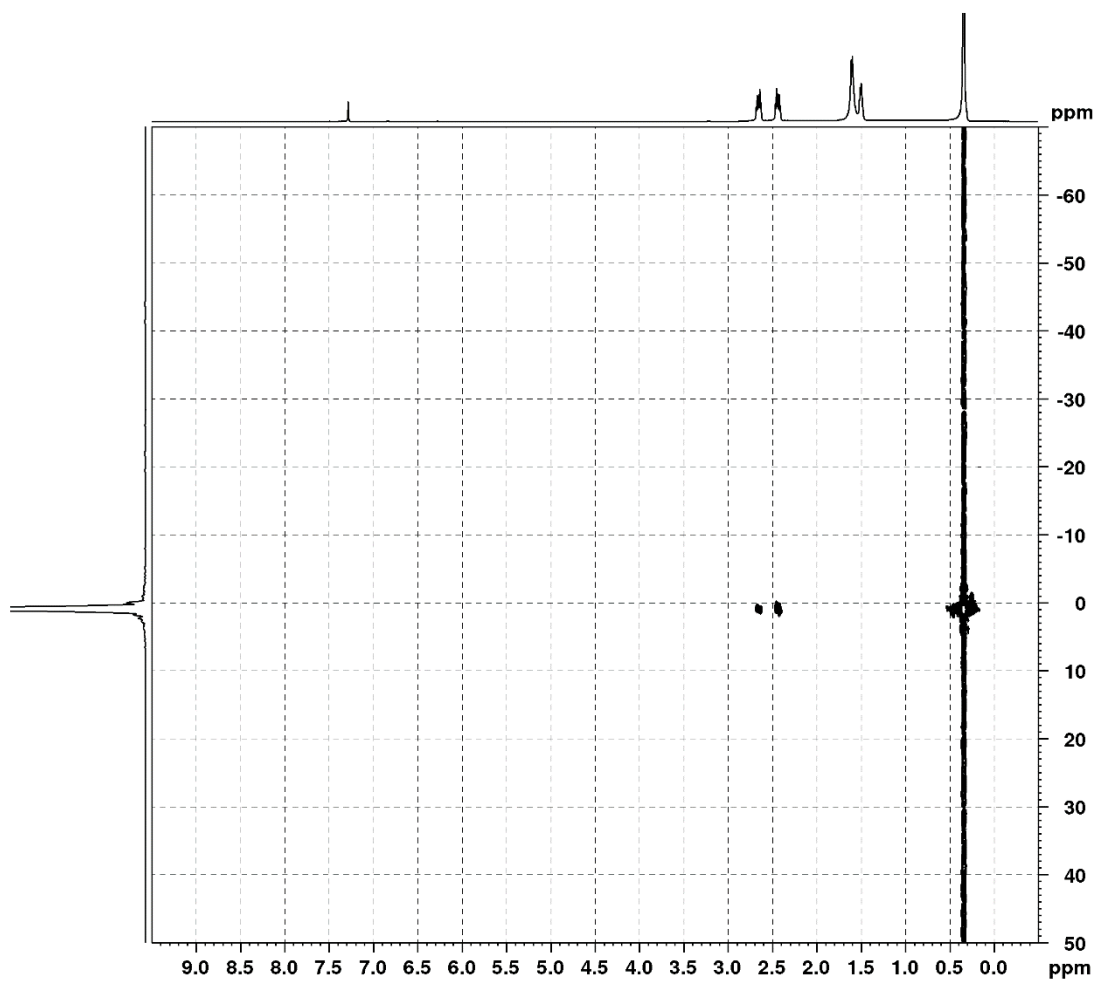

$^1\text{H}$  -  $^{29}\text{Si}$  HMBC NMR of 7
